# Supplementary material for: Catalyst-free thiolation of indoles with sulfonyl hydrazides for the synthesis of 3-sulfenylindoles in water
Source: Royal Society of Chemistry journal article supplement (doi:10.1039/c6gc00313c), 2016-01-01

## Supporting Information

### **Catalyst-free thiolation of indoles with sulfonyl hydrazides for the synthesis of 3-sulfenylindoles in water**

*Yu Yang, Sheng Zhang, Lin Tang, Yanbin Hu, Zhenggen Zha and Zhiyong  
Wang \**

*Hefei National Laboratory for Physical Sciences at Microscale, CAS Key Laboratory  
of Soft Matter Chemistry and Department of Chemistry & Collaborative Innovation  
Center of Suzhou Nano Science and Technology, University of Science and  
Technology of China, Hefei, 230026, P. R. China. Fax: (+86) 551-360-3185; E-mail:  
zwang3@ustc.edu.cn.*

### **Contents:**

|                                                                              |            |
|------------------------------------------------------------------------------|------------|
| <b>General remarks.....</b>                                                  | <b>S2</b>  |
| <b>General procedures for the synthesis of Arylsulfonyl Hydrazides .....</b> | <b>S2</b>  |
| <b>Characterization data of products.....</b>                                | <b>S2</b>  |
| <b>Reference.....</b>                                                        | <b>S12</b> |
| <b>NMR Spectra of products.....</b>                                          | <b>S12</b> |

## General Remarks

All substrates were purchased commercially without further purification. The yields were determined based on indoles.

$^1\text{H}$  and  $^{13}\text{C}$  NMR spectra were recorded on a Bruker AC-300 FT spectrometer at 400 MHz and 100 MHz, respectively, with tetramethylsilane as an internal reference. Chemical shifts ( $\delta$ ) and coupling constants ( $J$ ) were expressed in ppm and Hz, respectively. High resolution mass spectra (HRMS) were recorded on a LC-TOF spectrometer (Micromass).

## General procedures for the synthesis of Arylsulfonyl Hydrazides

Arylsulfonyl hydrazides **2b-2s** were prepared according to the literature procedure.<sup>[1]</sup> To a solution of an arylsulfonyl chloride (3.0 mmol) in tetrahydrofuran (15 mL), was added hydrazine monohydrate (375 mg, 7.5 mmol) dropwise under nitrogen at 0 °C. After vigorous stirring for 30 min at 0 °C, the reaction mixture was added ethyl acetate (60 mL), and washed with saturated brine (3 x 10 mL). The organic layer was dried over sodium sulfate, filtered, concentrated and added to hexane (12 mL) over 5 min. The mixture was filtered, and the collected solid was dried in vacuum.

## Characterization data of products

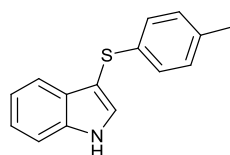

**3-(p-tolylthio)-1H-indole (3aa).**<sup>[1]</sup> The title compound was prepared according to the general working procedure and purified by column chromatography to give the product as a white solid: 87% yield; mp = 125–126 °C;  $^1\text{H}$  NMR (400 MHz,  $\text{CDCl}_3$ )  $\delta$  2.24 (s, 3H), 6.95 (d,  $J$  = 8.2 Hz, 2H), 7.01 (d,  $J$  = 8.2 Hz, 2H), 7.12 (t,  $J$  = 7.9 Hz, 1H), 7.24 (t,  $J$  = 7.9 Hz, 1H), 7.40 (d,  $J$  = 8.0 Hz, 1H), 7.44 (d,  $J$  = 2.5 Hz, 1H), 7.60 (d,  $J$  = 8.0 Hz, 1H), 8.37 (s, 1H);  $^{13}\text{C}$  NMR (100 MHz,  $\text{CDCl}_3$ )  $\delta$  136.5, 135.5, 134.6, 130.4, 129.5, 129.1, 126.3, 122.9, 120.8, 119.7, 111.5, 103.5, 20.8.

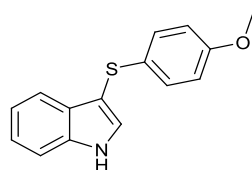

**3-(4-methoxyphenylthio)-1H-indole (3ab).**<sup>[1]</sup> The title compound was prepared according to the general working procedure and purified by column chromatography to give the product as a

yellow solid: 93% yield, mp = 111–113 °C;  $^1\text{H}$  NMR (400 MHz,  $\text{CDCl}_3$ )  $\delta$  3.76 (s, 3H), 6.78 (d,  $J$  = 8.8 Hz, 2H), 7.18 (m, 3H), 7.28 (t,  $J$  = 7.8 Hz, 1H), 7.43 (d,  $J$  = 8.1 Hz, 1H), 7.46 (d,  $J$  = 2.2 Hz, 1H), 7.68 (d,  $J$  = 7.8 Hz, 1H), 8.38 (s, 1H);  $^{13}\text{C}$  NMR (100 MHz,  $\text{CDCl}_3$ )  $\delta$  157.8, 136.5, 130.1, 129.5, 129.0, 128.6, 123.0, 120.8, 119.6, 114.5, 111.6, 104.5, 55.4.

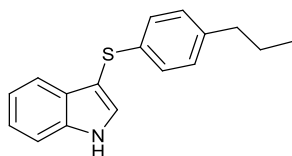

**3-(4-propylphenylthio)-1H-indole (3ac).** The title compound was prepared according to the general working procedure and purified by column chromatography to give the product as a white crystal: 89% yield; mp = 109–111 °C;  $^1\text{H}$  NMR (400 MHz,  $\text{CDCl}_3$ )  $\delta$  0.89 (t,  $J$  = 7.3 Hz, 3H), 1.56 (m, 2H), 2.47 (t,  $J$  = 7.3 Hz, 3H), 6.97 (d,  $J$  = 8.3 Hz, 2H), 7.03 (d,  $J$  = 8.3 Hz, 2H), 7.16 (t,  $J$  = 7.2 Hz, 1H), 7.24 (t,  $J$  = 7.2 Hz, 1H), 7.41 (d,  $J$  = 8.0 Hz, 1H), 7.45 (d,  $J$  = 2.5 Hz, 1H), 7.62 (d,  $J$  = 8.0 Hz, 1H), 8.39 (s, 1H);  $^{13}\text{C}$  NMR (100 MHz,  $\text{CDCl}_3$ )  $\delta$  139.5, 136.4, 135.8, 130.5, 129.2, 128.9, 126.1, 122.9, 120.8, 119.7, 111.5, 103.4, 37.4, 24.5, 13.8; HRMS  $[\text{M}+\text{H}]^+$  calcd. for  $\text{C}_{17}\text{H}_{18}\text{NS}$ : 268.1155, found 268.1154.

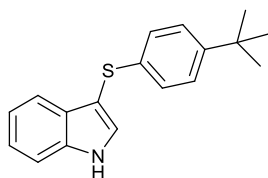

**3-(4-tert-butylphenylthio)-1H-indole (3ad).**<sup>[2]</sup> The title compound was prepared according to the general working procedure and purified by column chromatography to give the product as a white solid: 90% yield; mp = 185–187 °C;  $^1\text{H}$  NMR (400 MHz,  $\text{CDCl}_3$ )  $\delta$  1.24 (s, 9H), 7.04 (d,  $J$  = 8.4 Hz, 2H), 7.17 (m, 3H), 7.24 (t,  $J$  = 7.2 Hz, 1H), 7.42 (t,  $J$  = 8.0 Hz, 1H), 7.44 (d,  $J$  = 2.5 Hz, 1H), 7.64 (d,  $J$  = 8.0 Hz, 1H), 8.37 (s, 1H);  $^{13}\text{C}$  NMR (100 MHz,  $\text{CDCl}_3$ )  $\delta$  148.0, 136.5, 135.7, 130.6, 129.3, 125.9, 125.8, 123.0, 120.8, 119.7, 111.5, 103.4, 34.3, 31.3.

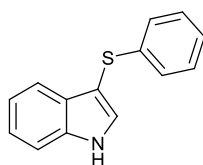

**3-(phenylthio)-1H-indole (3ae).**<sup>[1]</sup> The title compound was prepared according to the general working procedure and purified by column chromatography to give the product as a white solid: 91% yield; mp = 151–152 °C;  $^1\text{H}$  NMR (400 MHz,  $\text{CD}_3\text{COCD}_3$ )  $\delta$  7.11 (m, 7H), 7.55 (m, 2H), 7.68 (m, 1H), 10.84 (s, 1H);  $^{13}\text{C}$  NMR (100 MHz,  $\text{CD}_3\text{COCD}_3$ )  $\delta$  139.8, 137.2, 131.9, 129.2, 128.7, 125.6, 124.6, 122.4, 120.3, 118.7, 112.2, 100.9.

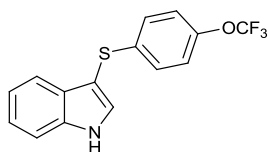

**3-(4-(trifluoromethoxy)phenylthio)-1H-indole (3af).**<sup>[2]</sup> The title compound was prepared according to the general working procedure and purified by column chromatography to give the product as a white solid: 70% yield; <sup>1</sup>H NMR (400 MHz, CDCl<sub>3</sub>) δ 6.92 (d, *J* = 8.3 Hz, 2H), 7.01 (d, *J* = 8.3 Hz, 2H), 7.11 (t, *J* = 7.4 Hz, 1H), 7.21 (t, *J* = 7.4 Hz, 1H), 7.38 (d, *J* = 8.0 Hz, 1H), 7.42 (s, 1H), 7.52 (d, *J* = 8.0 Hz, 1H), 8.48 (s, 1H); <sup>13</sup>C NMR (100 MHz, CDCl<sub>3</sub>) δ 146.6, 138.2, 136.5, 130.9, 128.8, 126.9, 123.3, 121.7 (q, *J* = 255.1 Hz), 121.5, 121.1, 119.5, 111.7, 102.3.

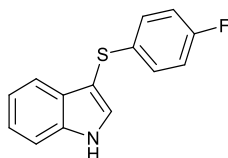

**3-(4-fluorophenylthio)-1H-indole (3ag).**<sup>[1]</sup> The title compound was prepared according to the general working procedure and purified by column chromatography to give the product as a white solid: 83% yield; mp = 132-133 °C; <sup>1</sup>H NMR (400 MHz, CDCl<sub>3</sub>) δ 6.86 (t, *J* = 8.4 Hz, 2H), 7.08 (m, 2H), 7.17 (t, *J* = 7.5 Hz, 1H), 7.27 (t, *J* = 7.5 Hz, 1H), 7.42 (d, *J* = 8.0 Hz, 1H), 7.47 (d, *J* = 2.5 Hz, 1H), 7.58 (d, *J* = 8.0 Hz, 1H), 8.40 (s, 1H); <sup>13</sup>C NMR (100 MHz, CDCl<sub>3</sub>) δ 162.1 (d, *J*<sub>CF</sub> = 242.5 Hz), 136.5, 134.0 (d, *J*<sub>CF</sub> = 2.9 Hz), 130.5, 128.9, 127.9 (d, *J*<sub>CF</sub> = 7.7 Hz), 123.1, 121.0, 119.5, 115.8 (d, *J*<sub>CF</sub> = 21.8 Hz), 111.6, 102.5.

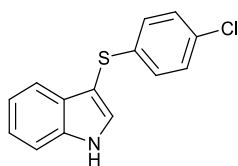

**3-(4-chlorophenylthio)-1H-indole (3ah).**<sup>[1]</sup> The title compound was prepared according to the general working procedure and purified by column chromatography to give the product as a white crystal: 66% yield; mp = 130-131 °C; <sup>1</sup>H NMR (400 MHz, CDCl<sub>3</sub>) δ 7.01 (d, *J* = 8.6 Hz, 2H), 7.11 (d, *J* = 8.6 Hz, 2H), 7.17 (t, *J* = 7.5 Hz, 1H), 7.27 (t, *J* = 7.5 Hz, 1H), 7.44 (d, *J* = 8.0 Hz, 1H), 7.47 (d, *J* = 2.5 Hz, 1H), 7.57 (d, *J* = 8.0 Hz, 1H), 8.43 (s, 1H); <sup>13</sup>C NMR (100 MHz, CDCl<sub>3</sub>) δ 137.8, 136.5, 130.7, 130.6, 128.8, 128.7, 127.1, 123.2, 121.1, 119.5, 111.7, 102.5.

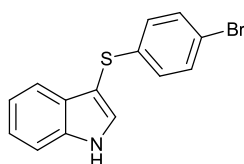

**3-(4-bromophenylthio)-1H-indole (3ai).**<sup>[1]</sup> The title compound was prepared according to the general working procedure and purified by column chromatography to give the product as a white solid: 65% yield; mp = 140-142 °C; <sup>1</sup>H NMR (400 MHz, CDCl<sub>3</sub>) δ 6.95 (d, *J* = 8.2 Hz, 2H), 7.17 (d, *J* = 8.2 Hz, 1H), 7.27 (m, 3H), 7.44 (d, *J* = 8.0 Hz, 1H), 7.49 (s, 1H), 7.57 (d, *J* = 8.0 Hz, 1H), 8.44 (s, 1H); <sup>13</sup>C NMR (100 MHz, CDCl<sub>3</sub>) δ 138.6, 136.5, 131.7, 130.8, 128.8, 127.4, 123.3, 121.1, 119.5, 118.3, 111.7, 102.3.

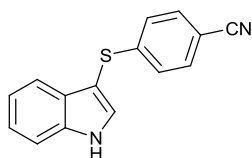

**4-(1H-indol-3-ylthio)benzonitrile (3aj).** The title compound was prepared according to the general working procedure and purified by column chromatography to give the product as a light green solid: 74% yield; mp = 184-186 °C;  $^1\text{H}$  NMR (400 MHz,  $\text{CDCl}_3$ )  $\delta$  7.03 (d,  $J$  = 8.4 Hz, 2H), 7.12 (t,  $J$  = 7.2 Hz, 1H), 7.23 (m, 1H), 7.32 (d,  $J$  = 8.4 Hz, 1H), 7.44 (m, 3H), 8.58 (s, 1H);  $^{13}\text{C}$  NMR (100 MHz,  $\text{CDCl}_3$ )  $\delta$  147.1, 136.6, 132.2, 131.2, 128.5, 125.4, 123.5, 121.3, 119.3, 119.2, 111.9, 107.6, 100.2. HRMS  $[\text{M}]^+$  calcd. for  $\text{C}_{15}\text{H}_{10}\text{N}_2\text{S}$ : 250.0565, found 250.0564.

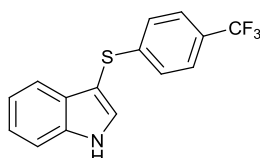

**3-(4-(trifluoromethyl)phenylthio)-1H-indole (3ak).**<sup>[2]</sup> The title compound was prepared according to the general working procedure and purified by column chromatography to give the product as a white solid: 52% yield;  $^1\text{H}$  NMR (400 MHz,  $\text{CDCl}_3$ )  $\delta$  7.17 (d,  $J$  = 8.2 Hz, 2H), 7.24 (t,  $J$  = 7.6 Hz, 1H), 7.35 (t,  $J$  = 7.6 Hz, 1H), 7.43 (d,  $J$  = 8.2 Hz, 2H), 7.53 (m, 2H), 7.63 (d,  $J$  = 8.0 Hz, 1H), 8.48 (s, 1H);  $^{13}\text{C}$  NMR (100 MHz,  $\text{CDCl}_3$ )  $\delta$  144.7, 136.6, 131.1, 128.8-120.3 (q,  $J$  = 271.2 Hz), 127.2-126.3 (q,  $J$  = 32.2 Hz), 125.5 (q,  $J$  = 3.6 Hz), 125.3, 123.4, 123.0, 121.3, 120.3, 119.4, 111.78, 101.2.

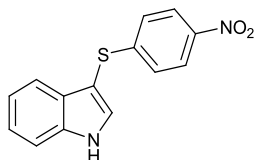

**3-(4-nitrophenylthio)-1H-indole (3al).**<sup>[1]</sup> The title compound was prepared according to the general working procedure and purified by column chromatography to give the product as a yellow solid: 82% yield; mp = 174–175 °C;  $^1\text{H}$  NMR (400 MHz,  $\text{CDCl}_3$ )  $\delta$  7.10 (m, 2H), 7.17 (m, 1H), 7.30 (m, 1H), 7.50 (m, 3H), 7.98 (m, 2H), 8.75 (s, 1H);  $^{13}\text{C}$  NMR (100 MHz,  $\text{CDCl}_3$ )  $\delta$  150.0, 144.8, 136.6, 131.4, 128.4, 125.1, 123.9, 123.5, 121.4, 119.2, 112.1, 100.0.

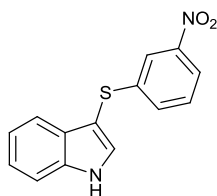

**3-(3-nitrophenylthio)-1H-indole (3am).**<sup>[1]</sup> The title compound was prepared according to the general working procedure and purified by column chromatography to give the product as a white solid: 78% yield; mp = 135–136 °C;  $^1\text{H}$  NMR (400 MHz,  $\text{CDCl}_3$ )  $\delta$  7.18 (t,  $J$  = 7.9 Hz, 2H), 7.29 (m, 1H), 7.35 (m, 1H), 7.48 (d,  $J$  = 8.4 Hz, 1H), 7.55 (m, 2H), 7.88 (m, 1H), 7.91 (m, 1H), 8.62 (s, 1H);  $^{13}\text{C}$  NMR (100 MHz,  $\text{CDCl}_3$ )  $\delta$  148.6, 142.6, 136.6, 131.3, 129.3, 128.5, 123.5, 121.3, 120.4, 119.7, 119.2, 111.9, 100.8.

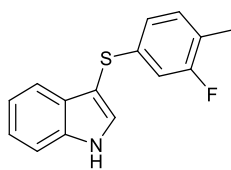

**3-(3-fluoro-4-methylphenylthio)-1H-indole (3ao).** The title compound was prepared according to the general working procedure and purified by column chromatography to give the product as a white solid: 82% yield; mp = 138-140 °C;  $^1\text{H}$  NMR (400 MHz,  $\text{CDCl}_3$ )  $\delta$  2.15 (s, 3H), 6.72 (m, 1H), 6.82 (m, 1H), 6.96 (t,  $J$  = 8.0 Hz, 1H), 7.17 (t,  $J$  = 7.8 Hz, 1H), 7.27 (d,  $J$  = 7.2 Hz, 1H), 7.44 (d,  $J$  = 8.0 Hz, 1H), 7.47 (d,  $J$  = 2.5 Hz, 1H), 7.6 (d,  $J$  = 7.8 Hz, 1H), 8.45 (s, 1H);  $^{13}\text{C}$  NMR (100 MHz,  $\text{CDCl}_3$ )  $\delta$  162.6 (d,  $J_{\text{CF}}$  = 244.8 Hz), 138.3 (d,  $J_{\text{CF}}$  = 7.6 Hz), 136.5, 131.4 (d,  $J_{\text{CF}}$  = 5.5 Hz), 130.7, 128.9, 123.1, 121.3 (d,  $J_{\text{CF}}$  = 3.5 Hz), 121.2, 121.0, 119.5, 112.7 (d,  $J_{\text{CF}}$  = 24.9 Hz), 111.6, 102.5, 14.0 (d,  $J_{\text{CF}}$  = 3.5 Hz); HRMS  $[\text{M}+\text{H}]^+$  calcd. for  $\text{C}_{15}\text{H}_{13}\text{FN}$ : 258.0753, found 258.0749.

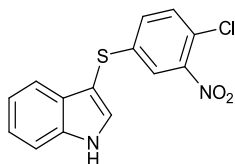

**3-(4-chloro-3-nitrophenylthio)-1H-indole (3ap).** The title compound was prepared according to the general working procedure and purified by column chromatography to give the product as a yellow solid: 50% yield; mp = 196-198 °C;  $^1\text{H}$  NMR (400 MHz,  $\text{CDCl}_3$ )  $\delta$  6.65 (d,  $J$  = 8.7 Hz, 1H), 7.23 (m, 4H), 7.44 (d,  $J$  = 8.0 Hz, 1H), 7.51 (d,  $J$  = 2.5 Hz, 1H), 7.61 (d,  $J$  = 7.9 Hz, 1H), 8.01 (d,  $J$  = 2.1 Hz, 1H), 8.42 (s, 1H);  $^{13}\text{C}$  NMR (100 MHz,  $\text{CDCl}_3$ )  $\delta$  142.8, 136.5, 135.6, 132.3, 130.3, 128.7, 126.5, 124.6, 123.2, 121.0, 119.4, 119.3, 111.7, 103.6; HRMS  $[\text{M}+\text{H}]^+$  calcd. for  $\text{C}_{14}\text{H}_{10}\text{ClN}_2\text{O}_2\text{S}$ : 305.0151, found 305.0141.

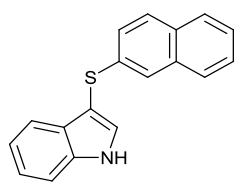

**3-(naphthalen-2-ylthio)-1H-indole (3aq).** The title compound was prepared according to the general working procedure and purified by column chromatography to give the product as a white crystal: 99% yield; mp = 142-143 °C;  $^1\text{H}$  NMR (400 MHz,  $\text{CD}_3\text{COCD}_3$ )  $\delta$  7.09 (t,  $J$  = 7.5 Hz, 1H), 7.22 (t,  $J$  = 7.5 Hz, 1H), 7.28 (d,  $J$  = 8.6 Hz, 1H), 7.39 (m, 2H), 7.57 (m, 4H), 7.77 (m, 3H), 10.88 (s, 1H);  $^{13}\text{C}$  NMR (100 MHz,  $\text{CD}_3\text{COCD}_3$ )  $\delta$  137.4, 137.2, 133.9, 132.1, 131.4, 129.2, 128.2, 127.7, 126.7, 126.5, 125.1, 124.5, 123.1, 122.5, 120.3, 118.8, 112.2, 100.8.

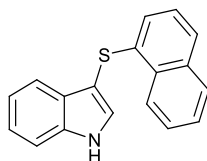

**3-(naphthalen-1-ylthio)-1H-indole (3ar).** The title compound was prepared according to the general working procedure and purified by column chromatography to give the product as a white solid: 67% yield; mp = 166-168 °C; <sup>1</sup>H NMR (400 MHz, CDCl<sub>3</sub>) δ 6.95 (dd, *J* = 7.4 Hz, 1.0Hz, 1H), 7.13 (m, 1H), 7.15 (d, *J* = 7.6, 1H), 7.27 (m, 1H), 7.43 (d, *J* = 8.0, 1H), 7.55 (m, 5H), 7.82 (m, 1H), 8.41 (s, 1H), 8.48 (d, *J* = 8.0, 1H); <sup>13</sup>C NMR (100 MHz, CDCl<sub>3</sub>) δ 136.6, 136.2, 133.7, 130.9, 130.8, 129.1, 128.5, 126.1, 126.0, 125.7, 125.2, 124.0, 123.4, 123.1, 120.9, 119.7, 116.7, 102.3; HRMS [M+H]<sup>+</sup> calcd. for C<sub>18</sub>H<sub>14</sub>NS: 276.0841, found 276.0849.

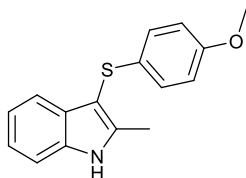

**3-(4-methoxyphenylthio)-2-methyl-1H-indole (3bb).**<sup>[3]</sup> The title compound was prepared according to the general working procedure and purified by column chromatography to give the product as a colorless solid: 68% yield; mp = 115-116 °C; <sup>1</sup>H NMR (400 MHz, CDCl<sub>3</sub>) δ 2.52 (s, 3H), 3.72 (s, 3H), 6.70 (m, 2H), 7.03 (m, 2H), 7.09 (m, 2H), 7.30 (m, 1H), 7.57 (d, *J* = 7.8 Hz, 1H), 8.19 (s, 1H); <sup>13</sup>C NMR (100 MHz, CDCl<sub>3</sub>) δ 157.5, 140.6, 135.4, 132.7, 129.9, 127.9, 122.1, 120.6, 119.0, 114.5, 110.6, 101.0, 55.3, 12.2.

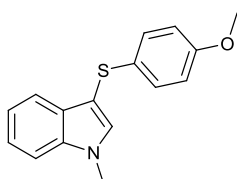

**3-(4-methoxyphenylthio)-1-methyl-1H-indole (3cb).**<sup>[4]</sup> The title compound was prepared according to the general working procedure and purified by column chromatography to give the product as a white solid: 99% yield; mp = 60-62 °C; <sup>1</sup>H NMR (400 MHz, CDCl<sub>3</sub>) δ 3.72 (s, 3H), 3.81 (s, 3H), 6.71 (d, *J* = 8.8 Hz, 2H), 7.13 (m, 3H), 7.29 (m, 2H), 7.35 (d, *J* = 8.0 Hz, 1H), 7.62 (d, *J* = 8.0 Hz, 1H), 7.82 - 7.85 (m, 2H); <sup>13</sup>C NMR (100 MHz, CDCl<sub>3</sub>) δ 157.7, 137.5, 134.5, 130.0, 129.7, 128.4, 122.5, 120.4, 119.7, 114.5, 109.7, 102.3, 55.3, 33.1.

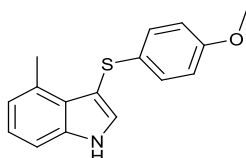

**3-(4-methoxyphenylthio)-4-methyl-1H-indole (3db).** The title compound was prepared according to the general working procedure and purified by column chromatography to give the product as a white solid: 56% yield; mp = 117-119 °C; <sup>1</sup>H NMR (400 MHz, CDCl<sub>3</sub>) δ 2.67 (s, 3H), 3.74 (s, 3H), 6.75 (d, *J* = 8.8 Hz, 2H), 6.88 (d, *J* = 7.1 Hz, 1H), 7.03 (d, *J* = 8.8 Hz, 2H), 7.13 (t, *J* = 7.8 Hz, 1H), 7.25 (d, *J* = 7.1 Hz, 1H), 7.42 (d, *J* = 2.5 Hz, 1H), 8.37 (s, 1H); <sup>13</sup>C NMR (100 MHz, CDCl<sub>3</sub>) δ 157.4, 137.0, 132.1, 132.0, 131.5, 127.6, 126.9, 123.1, 122.4, 114.6, 109.4, 103.8, 55.4, 18.8; HRMS [M+H]<sup>+</sup> calcd. for C<sub>16</sub>H<sub>16</sub>NOS: 270.0953, found 270.0944.

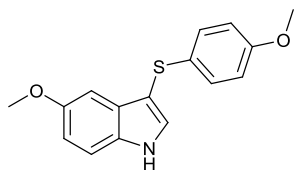

**5-methoxy-3-(4-methoxyphenylthio)-1H-indole (3eb).** The title compound was prepared according to the general working procedure and purified by column chromatography to give the product as a white solid: 72% yield; mp = 57-59 °C;  $^1\text{H}$  NMR (400 MHz,  $\text{CDCl}_3$ )  $\delta$  3.73 (s, 3H), 3.80 (s, 3H), 6.88 (dd,  $J$  = 8.8 Hz, 2.3 Hz, 2H), 7.06 (d,  $J$  = 2.3 Hz, 1H), 7.10 (d,  $J$  = 8.8 Hz, 2H), 7.31 (d,  $J$  = 8.8 Hz, 1H), 7.43 (d,  $J$  = 2.5 Hz, 1H), 8.31 (s, 1H);  $^{13}\text{C}$  NMR (100 MHz,  $\text{CDCl}_3$ )  $\delta$  156.4, 154.0, 130.3, 129.7, 128.8, 128.6, 127.2, 113.4, 112.4, 111.3, 102.8, 99.8, 54.8, 54.3; HRMS  $[\text{M}+\text{H}]^+$  calcd. for  $\text{C}_{16}\text{H}_{16}\text{NO}_2\text{S}$ : 286.0902, found 286.0896.

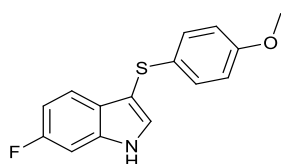

**6-fluoro-3-(4-methoxyphenylthio)-1H-indole (3fb).** The title compound was prepared according to the general working procedure and purified by column chromatography to give the product as a white solid: 85% yield; mp = 86-88 °C;  $^1\text{H}$  NMR (400 MHz,  $\text{CDCl}_3$ )  $\delta$  3.73 (s, 3H), 6.75 (d,  $J$  = 8.6 Hz, 2H), 6.89 (m, 1H), 7.10 (m, 3H), 7.43 (s, 1H), 7.51 (m, 1H), 8.39 (s, 1H);  $^{13}\text{C}$  NMR (100 MHz,  $\text{CDCl}_3$ )  $\delta$  161.6 (d,  $J_{\text{CF}}$  = 237.7 Hz), 157.9, 136.4 (d,  $J_{\text{CF}}$  = 12.7 Hz), 130.2 (d,  $J_{\text{CF}}$  = 3.1 Hz), 139.0, 128.7, 125.4, 120.6 (d,  $J_{\text{CF}}$  = 10.1 Hz), 114.5, 109.7 (d,  $J_{\text{CF}}$  = 24.6 Hz), 105.1, 98.0 (d,  $J_{\text{CF}}$  = 26.2 Hz), 55.3; HRMS  $[\text{M}+\text{H}]^+$  calcd. for  $\text{C}_{15}\text{H}_{13}\text{FNOS}$ : 274.0702, found 274.0701.

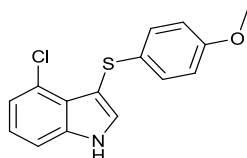

**4-chloro-3-(4-methoxyphenylthio)-1H-indole (3gb).** The title compound was prepared according to the general working procedure and purified by column chromatography to give the product as a white solid: 74% yield; mp = 77-79 °C;  $^1\text{H}$  NMR (400 MHz,  $\text{CDCl}_3$ )  $\delta$  3.74 (s, 3H), 6.75 (m, 2H), 7.13 (m, 4H), 7.30 (m, 1H), 7.41 (s, 1H), 8.47 (s, 1H);  $^{13}\text{C}$  NMR (100 MHz,  $\text{CDCl}_3$ )  $\delta$  157.8, 138.0, 131.8, 130.8, 128.8, 126.9, 125.0, 123.5, 122.1, 114.5, 110.4, 105.0, 55.3; HRMS  $[\text{M}+\text{H}]^+$  calcd. for  $\text{C}_{15}\text{H}_{13}\text{ClNOS}$ : 290.0406, found 290.0408.

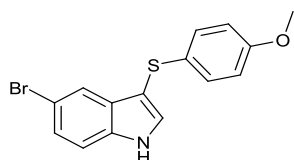

**5-bromo-3-(4-methoxyphenylthio)-1H-indole (3hb).** The title compound was prepared according to the general working procedure and purified by column chromatography to give the product as a white solid: 81% yield; mp = 106-108 °C;  $^1\text{H}$  NMR (400 MHz,  $\text{CDCl}_3$ )  $\delta$  3.74 (s, 3H), 6.75 (m, 2H), 7.11 (m, 2H), 7.28 (d,  $J$  = 8.6 Hz, 1H), 7.31 (dd,  $J$  = 8.6 Hz, 1.8 Hz, 1H), 7.45 (d,  $J$



= 2.5 Hz, 1H), 7.76 (d,  $J$  = 1.8 Hz, 1H), 8.40 (s, 1H);  $^{13}\text{C}$  NMR (100 MHz,  $\text{CDCl}_3$ )  $\delta$  158.0, 135.1, 131.2, 130.9, 128.9, 128.7, 126.0, 122.2, 114.6, 114.3, 113.0, 104.6, 55.4; HRMS  $[\text{M}+\text{H}]^+$  calcd. for  $\text{C}_{15}\text{H}_{13}\text{BrNOS}$ : 333.9901, found 333.9904.

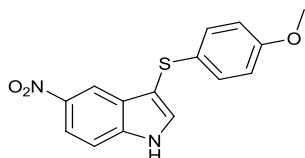

**3-(4-methoxyphenylthio)-5-nitro-1H-indole (3ib).** The title compound was prepared according to the general working procedure and purified by column chromatography to give the product as a yellow solid: 35% yield; mp = 181-183 °C;  $^1\text{H}$  NMR (400 MHz,  $\text{CDCl}_3$ )  $\delta$  3.75 (s, 3H), 6.76 (m, 2H), 7.18 (m, 2H), 7.47 (d,  $J$  = 8.9 Hz, 1H), 7.61 (d,  $J$  = 8.6 Hz, 1H), 8.14 (dd,  $J$  = 8.9 Hz, 2.4 Hz, 1H), 8.58 (d,  $J$  = 2.0 Hz, 1H), 8.78 (s, 1H);  $^{13}\text{C}$  NMR (100 MHz,  $\text{CDCl}_3$ )  $\delta$  157.4, 141.7, 138.4, 131.5, 128.8, 127.6, 126.8, 117.6, 115.9, 113.7, 110.7, 107.9, 55.3; HRMS  $[\text{M}+\text{H}]^+$  calcd. for  $\text{C}_{15}\text{H}_{13}\text{N}_2\text{O}_3\text{S}$ : 301.0642, found 301.0637.

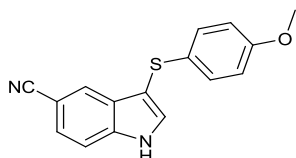

**3-(4-methoxyphenylthio)-1H-indole-5-carbonitrile (3jb).** The title compound was prepared according to the general working procedure and purified by column chromatography to give the product as a white solid: 56% yield; mp = 236-238 °C;  $^1\text{H}$  NMR (400 MHz,  $\text{CD}_3\text{COCD}_3$ )  $\delta$  3.73 (s, 3H), 6.83 (m, 2H), 7.20 (m, 2H), 7.51 (dd,  $J$  = 8.5 Hz, 1.6 Hz, 1H), 7.71 (m, 1H), 7.88 (d,  $J$  = 2.5 Hz, 1H), 7.92 (m, 1H), 11.21 (s, 1H);  $^{13}\text{C}$  NMR (100 MHz,  $\text{CD}_3\text{COCD}_3$ )  $\delta$  158.5, 138.8, 133.6, 129.5, 129.0, 128.4, 125.1, 124.1, 119.8, 114.6, 113.5, 105.1, 103.4, 54.7; HRMS  $[\text{M}]^+$  calcd. for  $\text{C}_{16}\text{H}_{12}\text{N}_2\text{OS}$ : 280.0670, found 280.0671.

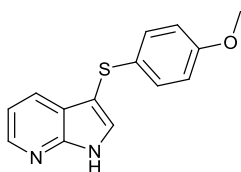

**3-(4-methoxyphenylthio)-1H-pyrrolo[2,3-b]pyridine (3kb).** The title compound was prepared according to the general working procedure and purified by column chromatography to give the product as a white solid: 65% yield; mp = 173-175 °C;  $^1\text{H}$  NMR (400 MHz,  $\text{CDCl}_3$ )  $\delta$  3.12 (s, 3H), 6.78 (d,  $J$  = 8.7 Hz, 2H), 7.15 (m, 3H), 7.66 (s, 1H), 7.97 (d,  $J$  = 7.8 Hz, 1H), 8.38 (s, 1H), 10.94 (s, 1H);  $^{13}\text{C}$  NMR (100 MHz,  $\text{CDCl}_3$ )  $\delta$  158.1, 148.4, 142.9, 130.9, 129.1, 128.8, 128.6, 122.2, 116.7, 114.6, 103.8, 55.3; HRMS  $[\text{M}]^+$  calcd. for  $\text{C}_{14}\text{H}_{12}\text{N}_2\text{OS}$ : 256.0665, found 256.0656.

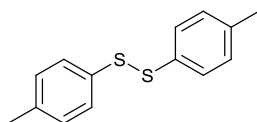

**1,2-dip-tolyldisulfane (4).**<sup>[1]</sup> The title compound was prepared according to the general working

procedure and purified by column chromatography to give the product as a white solid: 25% yield; mp = 45–46 °C; <sup>1</sup>H NMR (400 MHz, CDCl<sub>3</sub>) δ 2.31 (s, 6H), 7.10 (d, *J* = 8.0 Hz, 4H), 7.38 (d, *J* = 8.0 Hz, 4H); <sup>13</sup>C NMR (100 MHz, CDCl<sub>3</sub>) δ 137.5, 133.9, 129.8, 128.5, 21.1.

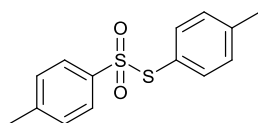

**4-methylbenzenesulfonothioic acid S-(4-methylphenyl) ester (5).**<sup>[1]</sup> The title compound was prepared according to the general working procedure and purified by column chromatography to give the product as a white solid: 57% yield; mp = 91-93 °C; <sup>1</sup>H NMR (400 MHz, CDCl<sub>3</sub>) δ 2.36 (s, 3H), 2.41 (s, 3H), 7.13 (d, *J* = 8.0 Hz, 2H), 7.21 (t, *J* = 8.0 Hz, 4H), 7.44 (d, *J* = 8.3 Hz, 2H); <sup>13</sup>C NMR (100 MHz, CDCl<sub>3</sub>) δ 144.7, 142.1, 140.4, 136.5, 130.3, 129.4, 127.6, 124.5, 21.7, 21.5.

#### Reference

- [1] F.-L. Yang, X.-T. Ma and S.-K. Tian, *Chem. Eur. J.*, 2012, **18**, 1582.
- [2] F. Xiao, H. Xie, S. Liu, G.-J. Deng, *Adv. Synth. Catal.*, 2014, **356**, 364–368.
- [3] G. L. Regina, V. Gatti, V. Famiglioni, F. Piscitelli, and R. Silvestri, *ACS Comb. Sci.*, 2012, **14**, 258–262.
- [4] M. Tudge, M. Tamiya, C. Savarin and G. R. Humphrey, *Org. Lett.*, 2006, **8**, 565-568.

# NMR Spectra of products

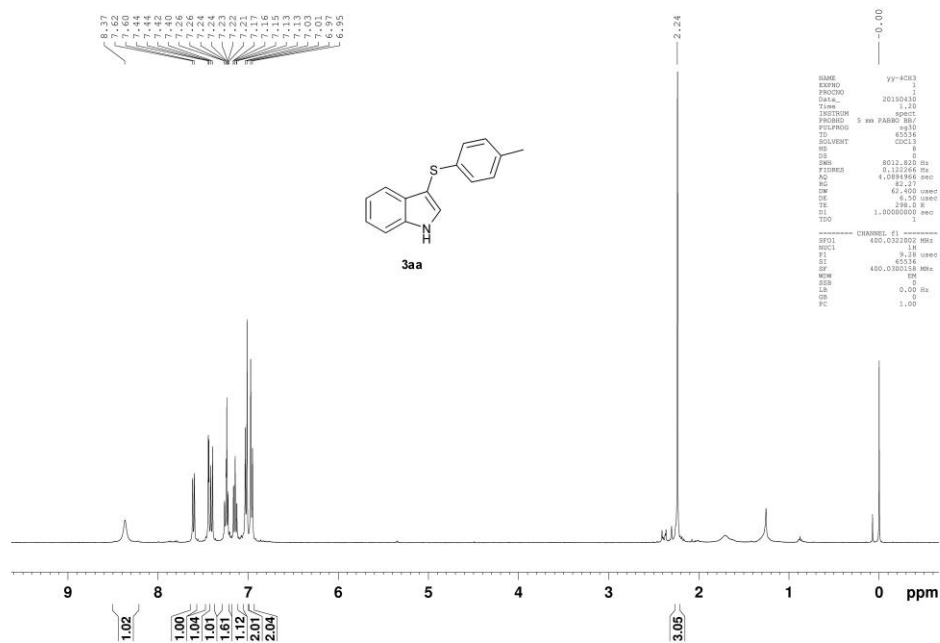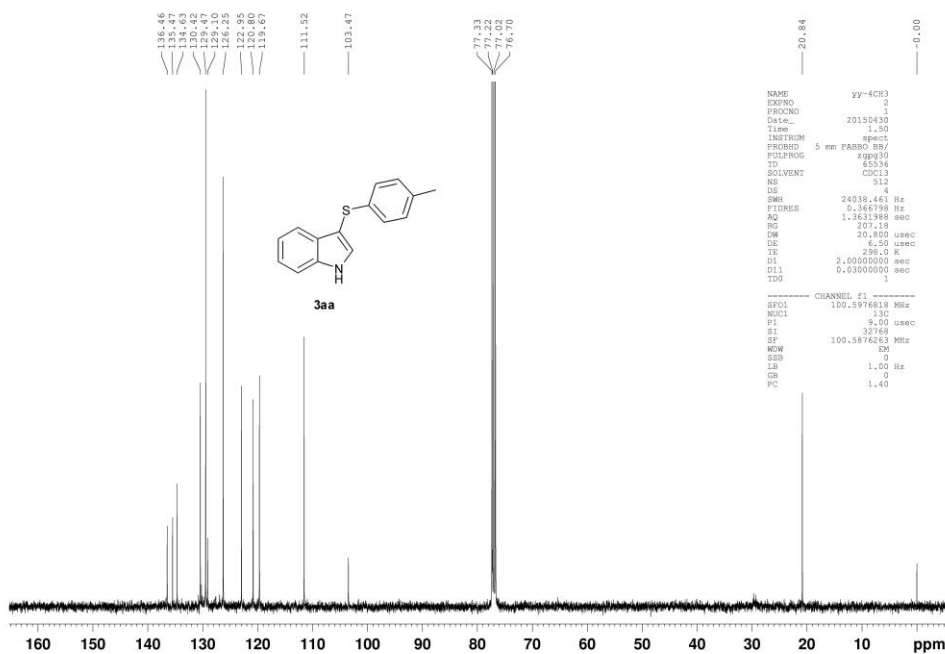

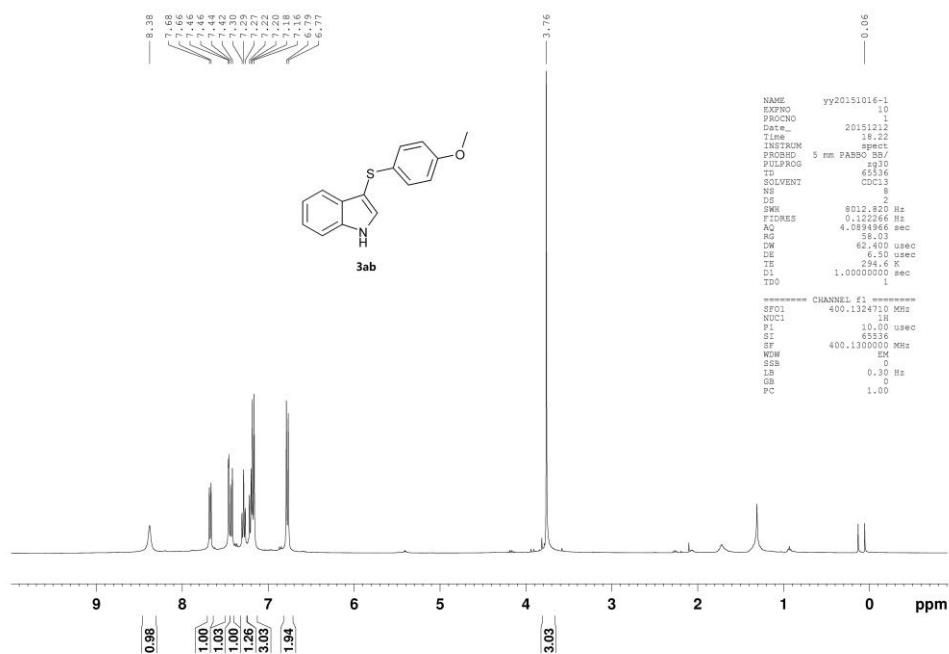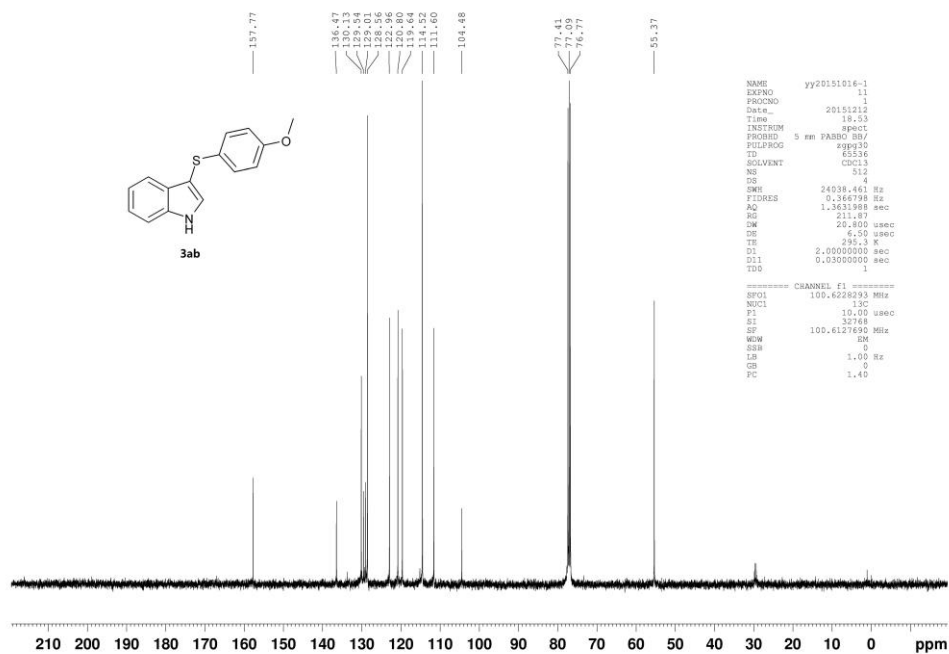

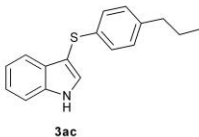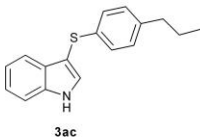

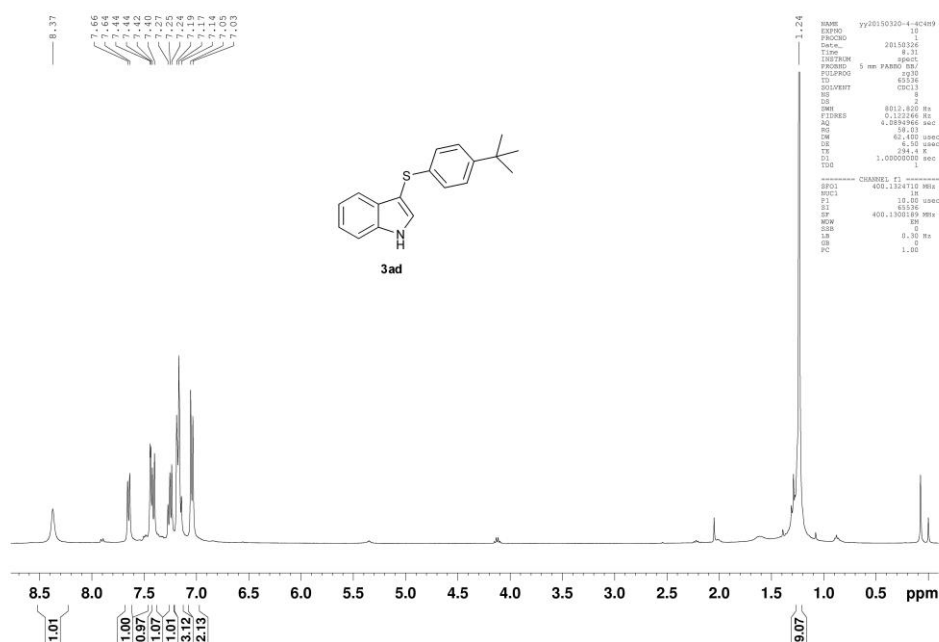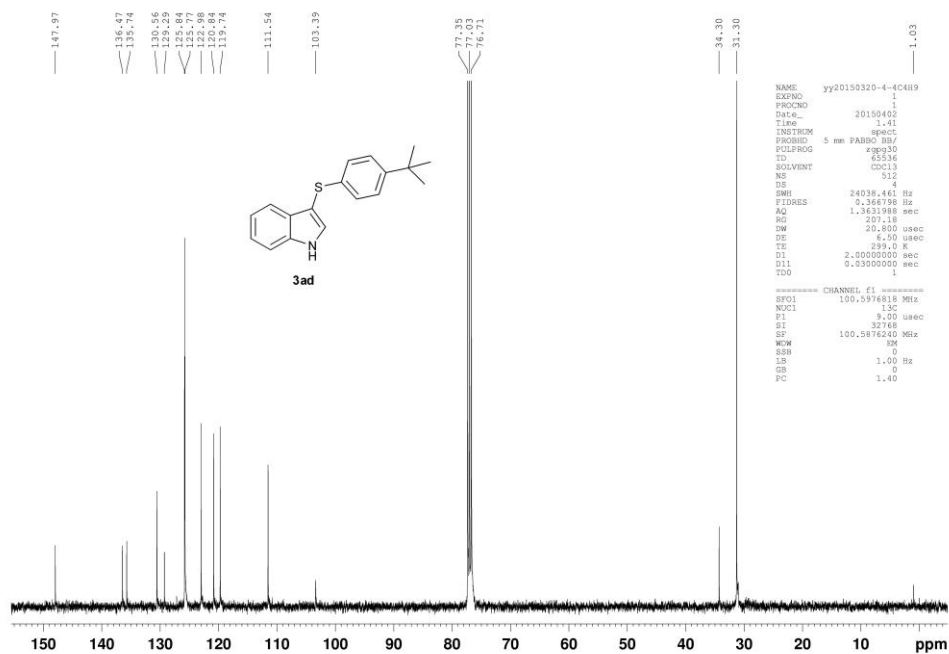

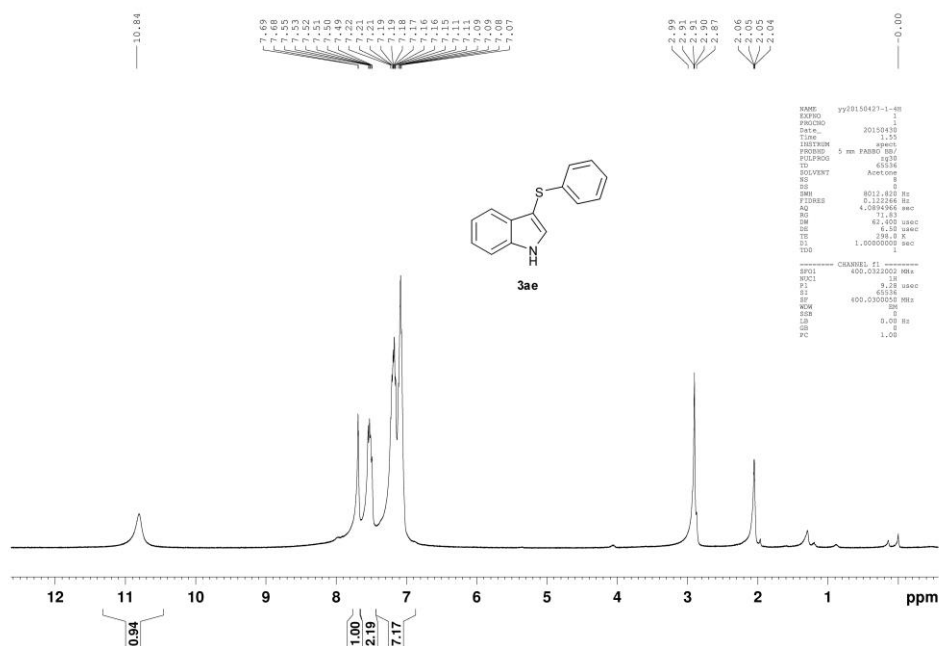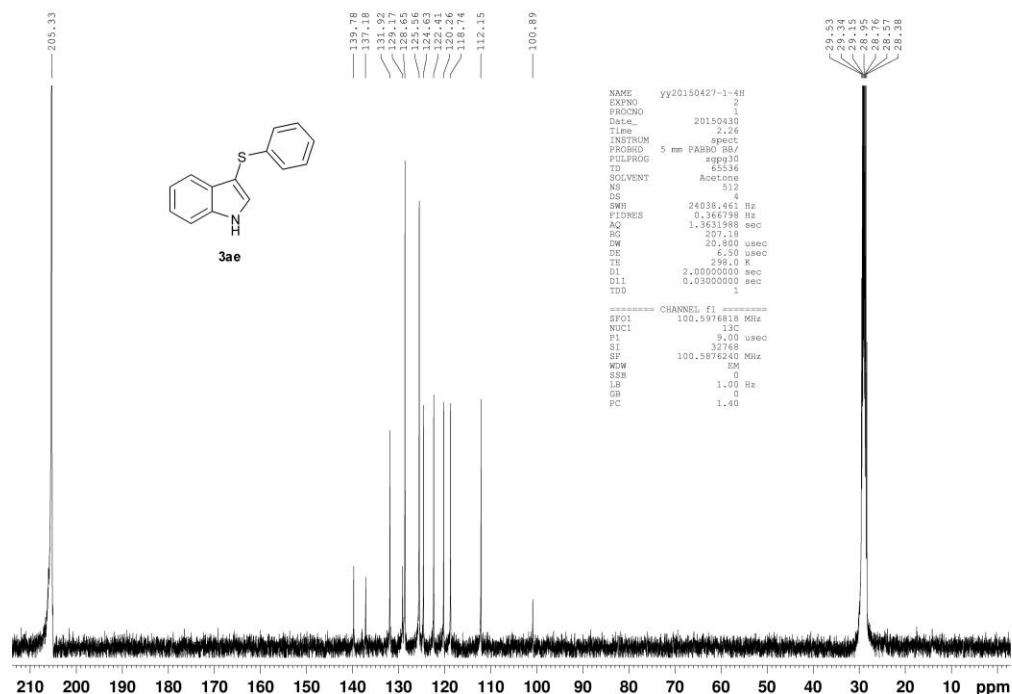

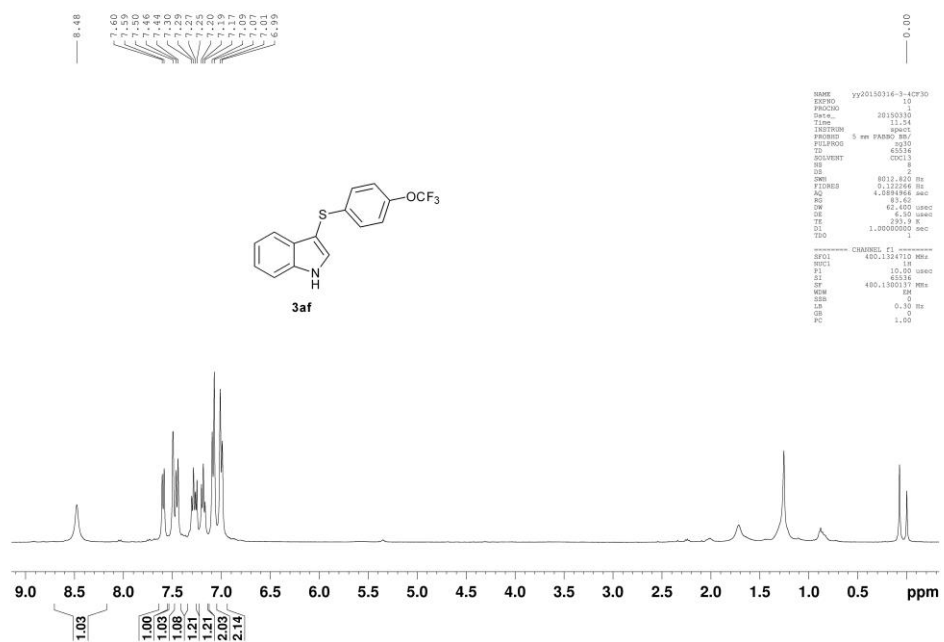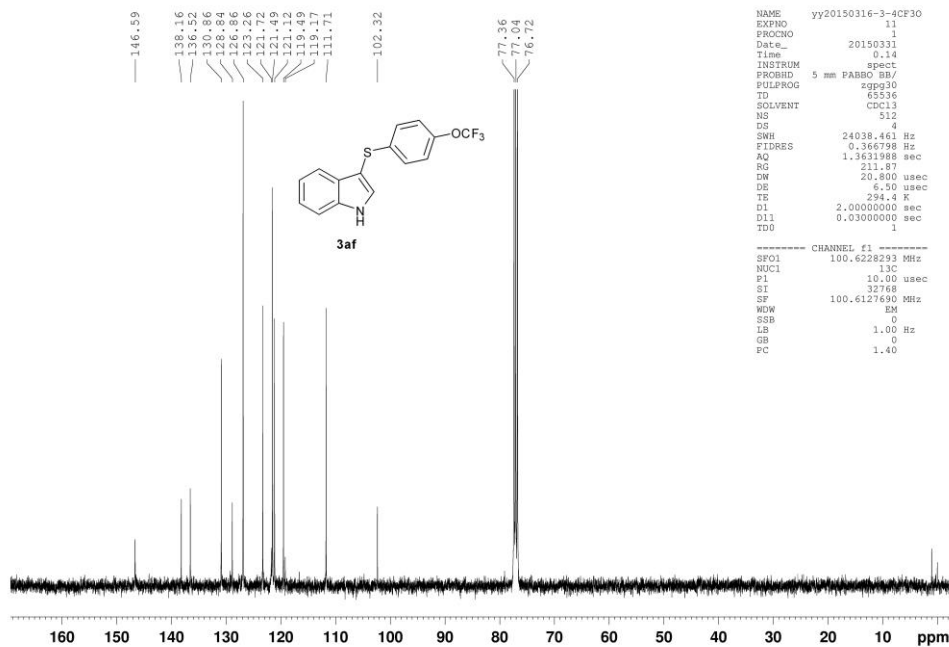



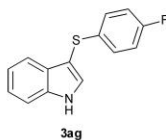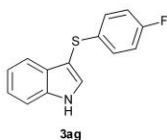

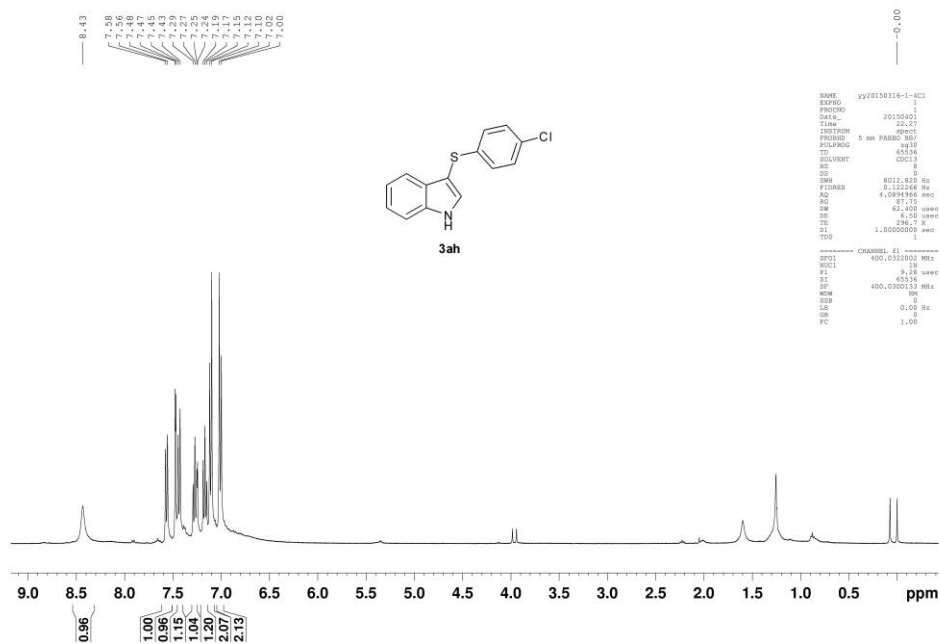

```

NAME      yy20150316-1-4C1
EXPNO     1
PROCNO    1
DATE_     20150401
TIME      22.27
INSTRUM    spect
PROBHD     5 mm PABBO BB/
PULPROG    zgpg30
TD         65536
SOLVENT    CDCl3
NS         8
DS         4
SWH         8012.810 Hz
FIDRES     0.122266 Hz
AQ         4.089766 sec
RG         87.75
OW         42.100 usec
DE         6.40 usec
TE         296.2 K
D1         1.00000000 sec
D11        1
TDO        1
===== CHANNEL f1 =====
SFO1      400.032000 MHz
NUC1       1H
P1         9.18 usec
PL         0.00 dB
SF         400.0300133 MHz
WOWH       0
SGB         0
LB         0.00 Hz
GB         0
PC         1.00

```

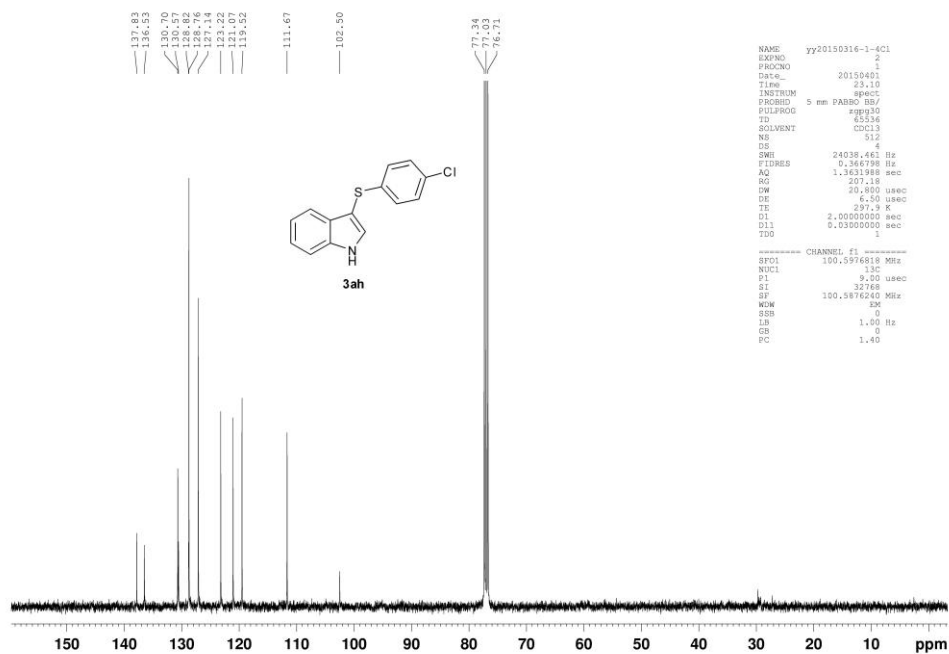

```

NAME      yy20150316-1-4C1
EXPNO     2
PROCNO    2
DATE_     20150401
TIME      23.10
INSTRUM    spect
PROBHD     5 mm PABBO BB/
PULPROG    zgpg30
TD         65536
SOLVENT    CDCl3
NS         8
DS         4
SWH         24038.461 Hz
FIDRES     0.366798 Hz
AQ         1.3631988 sec
RG         207.18
OW         50.800 usec
DE         6.50 usec
TE         297.9 K
D1         2.00000000 sec
D11        1
TDO        0.03000000 sec
===== CHANNEL f1 =====
SFO1      100.5976818 MHz
NUC1      13C
P1         9.00 usec
PL         0.00 dB
SF         100.5876240 MHz
WOWH       2K
SGB         0
LB         1.00 Hz
GB         0
PC         1.40

```

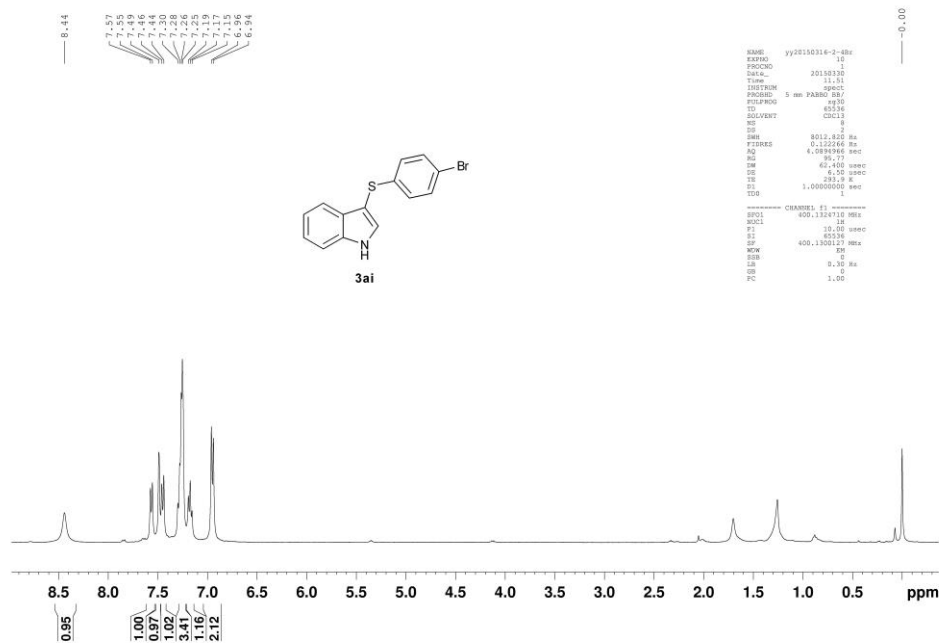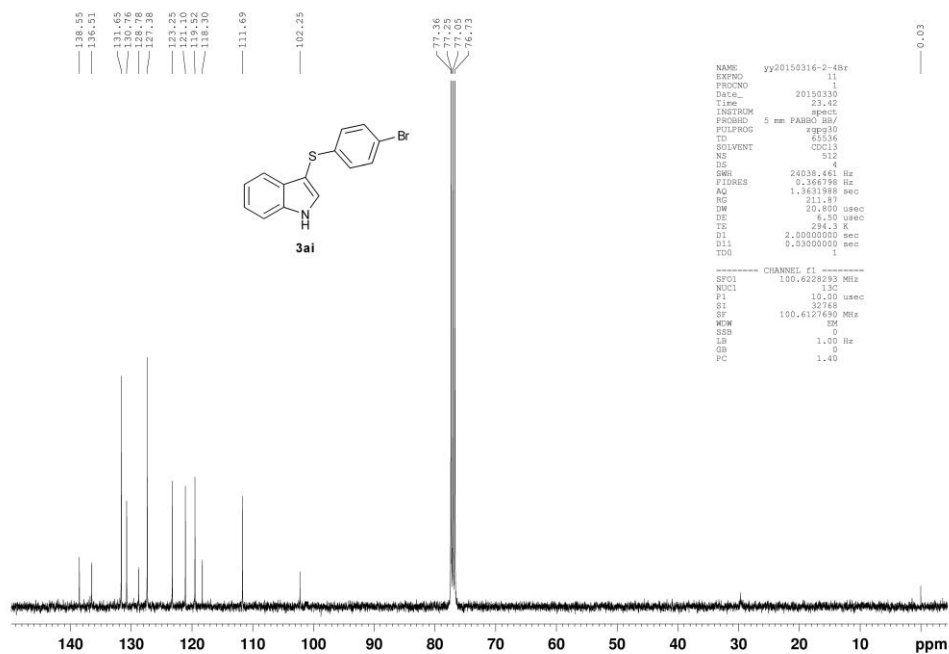

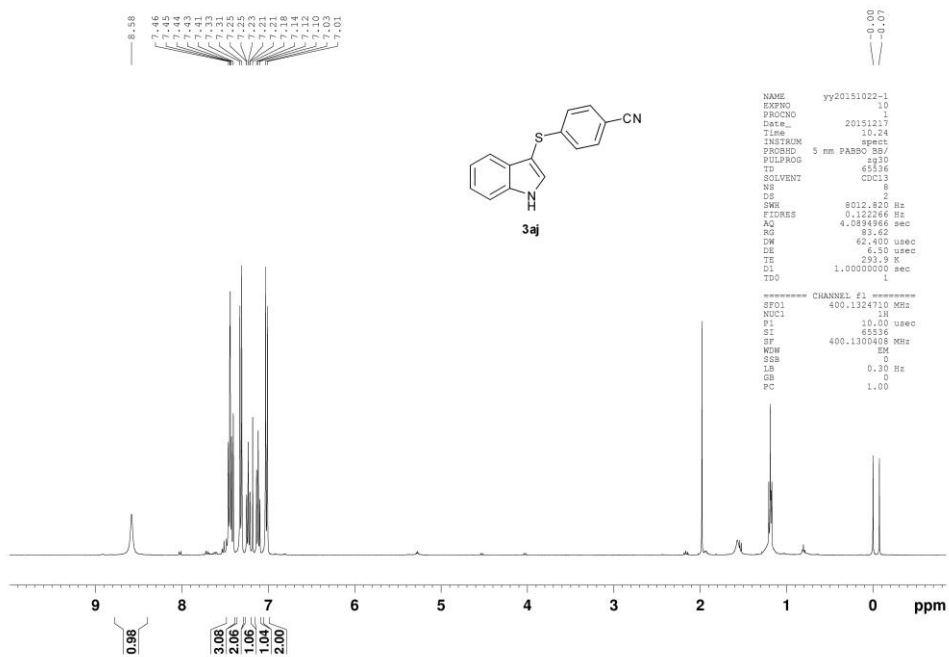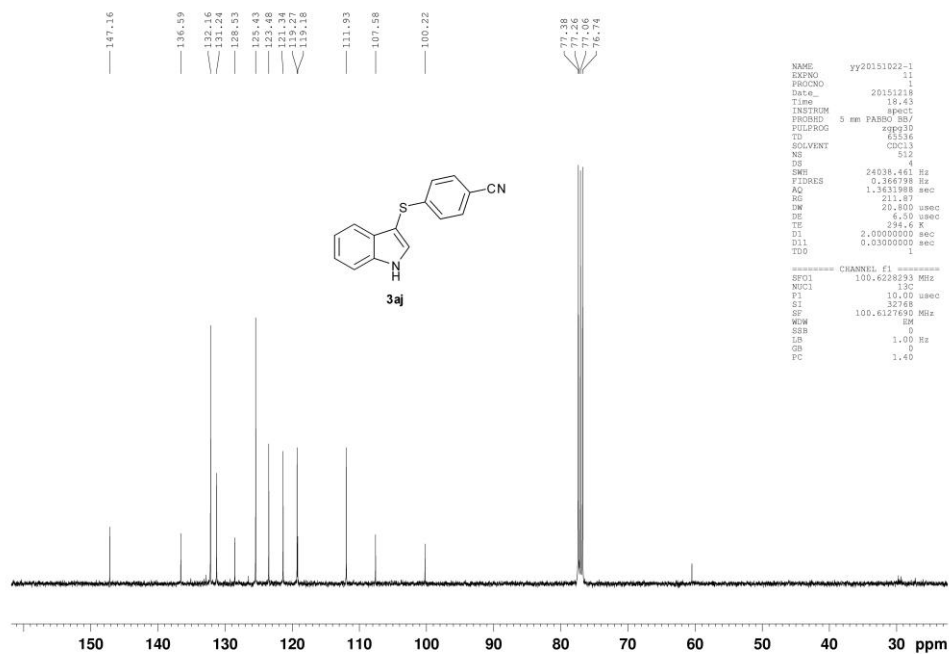

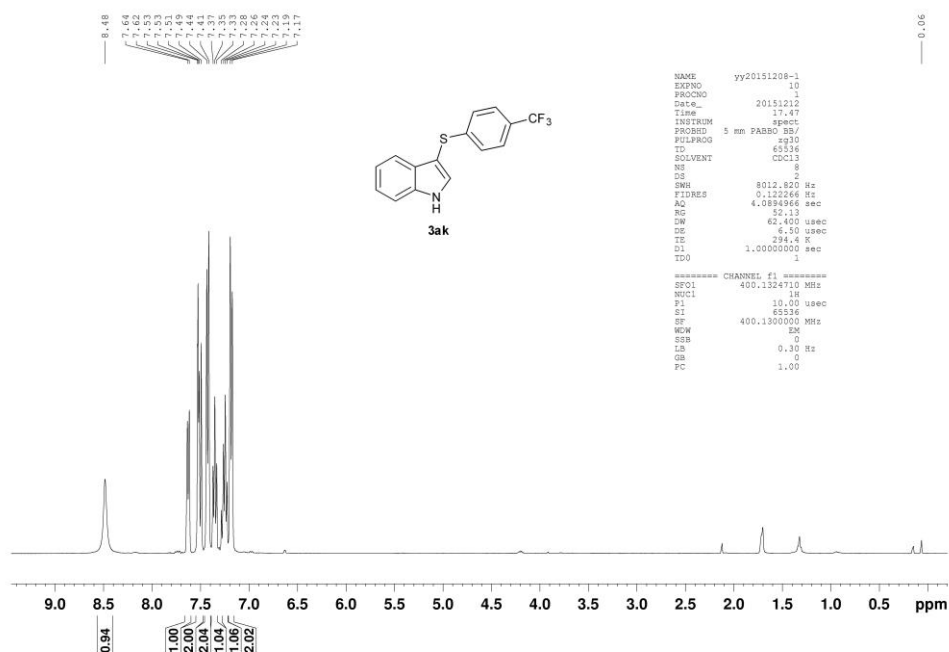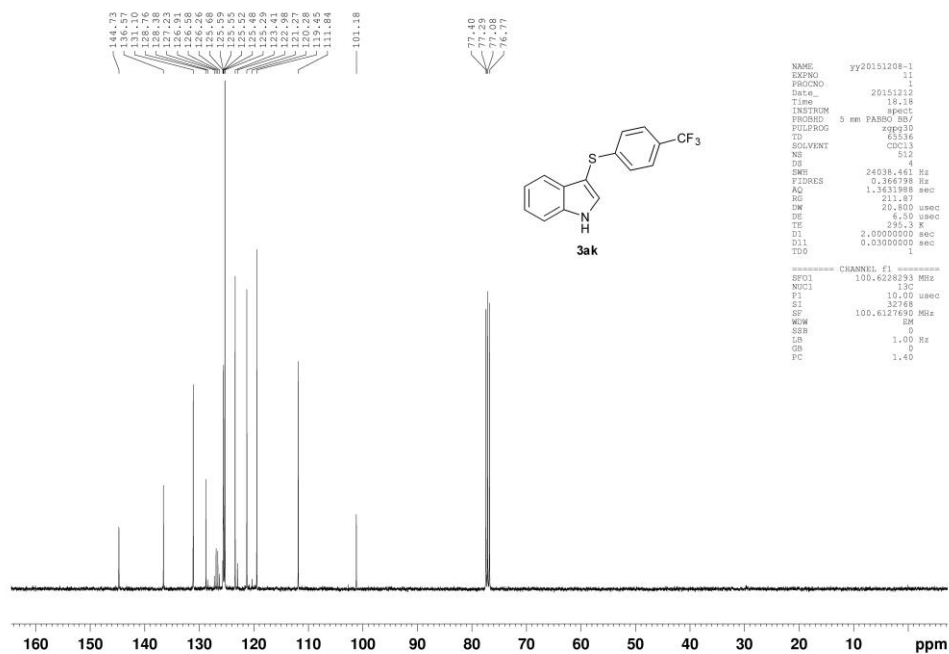

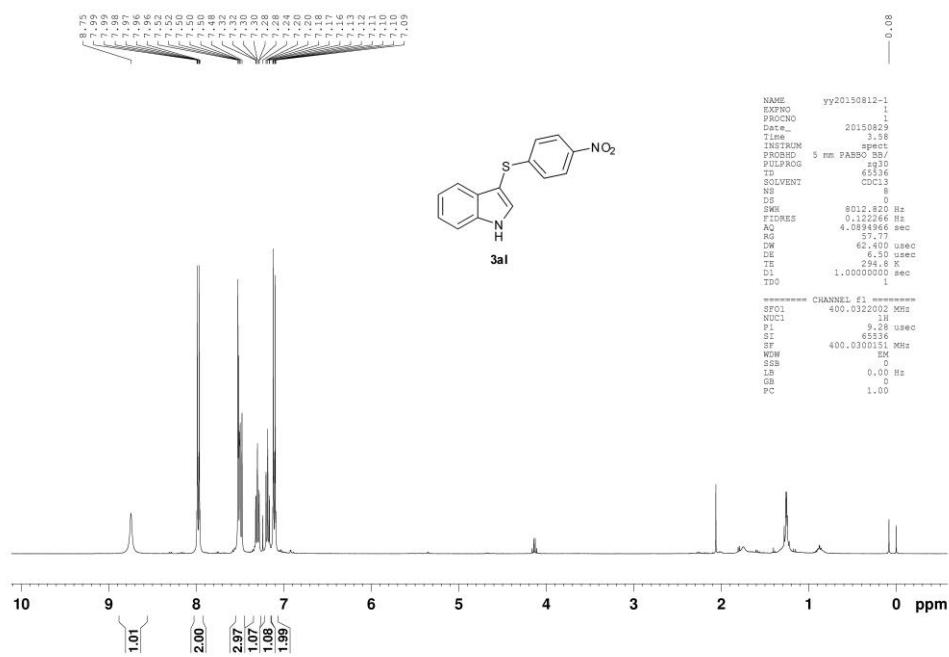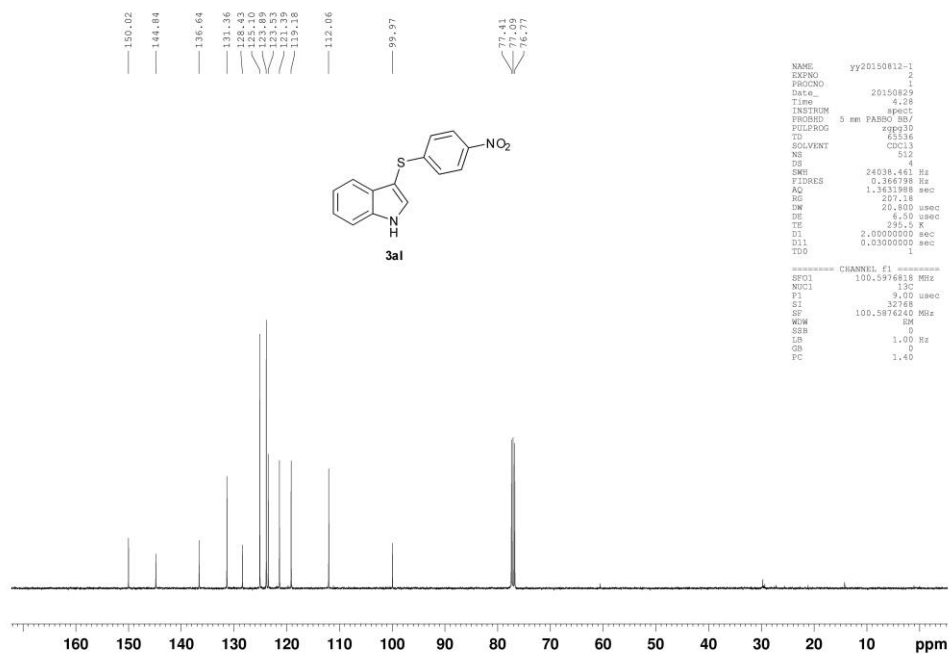

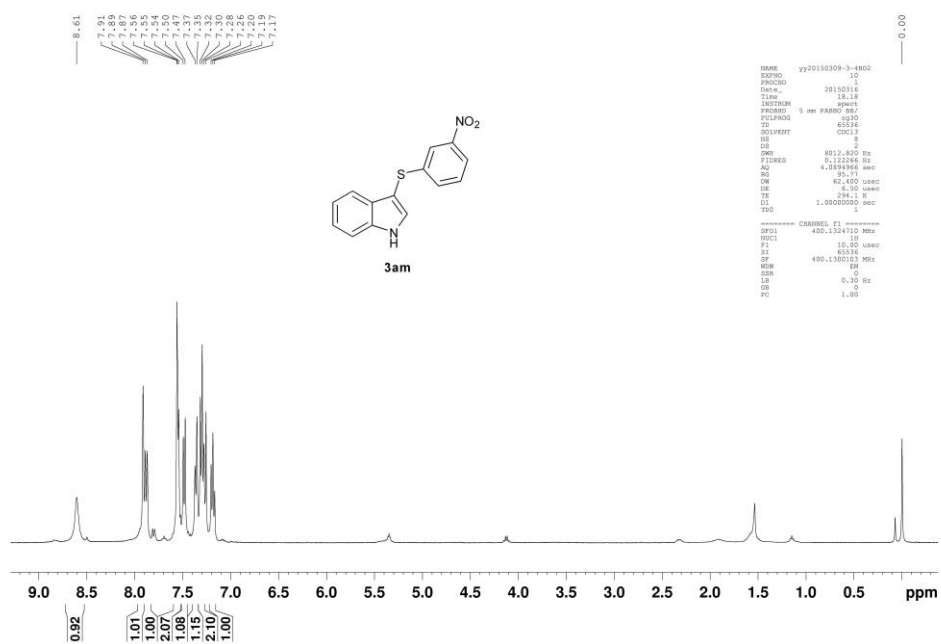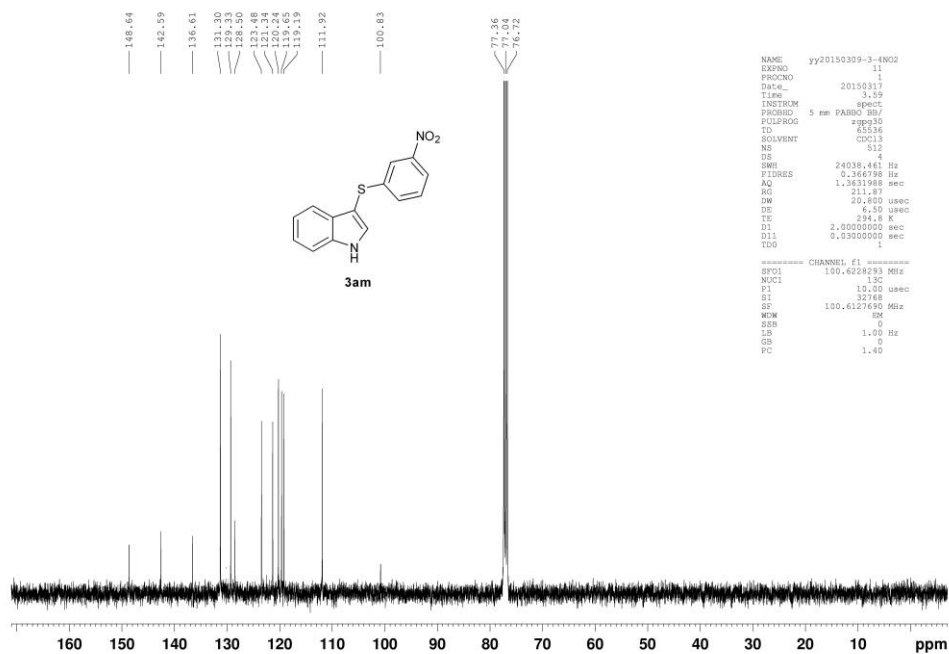

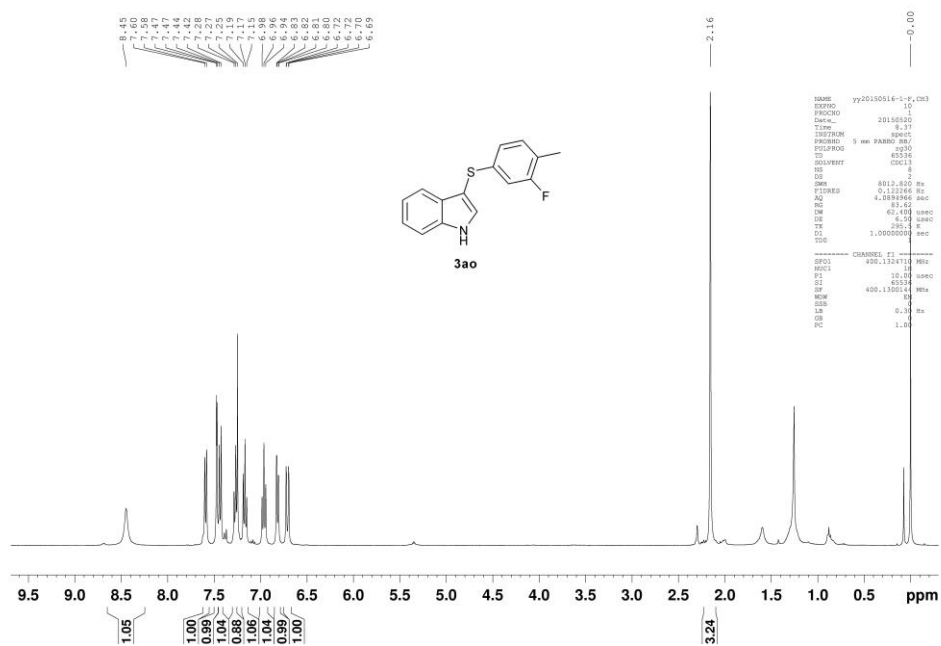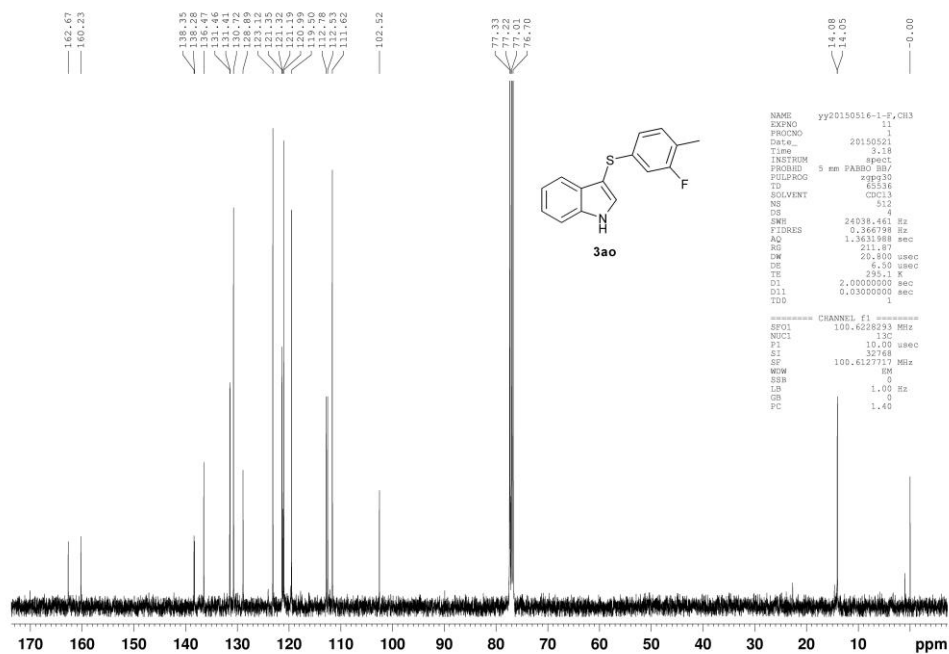



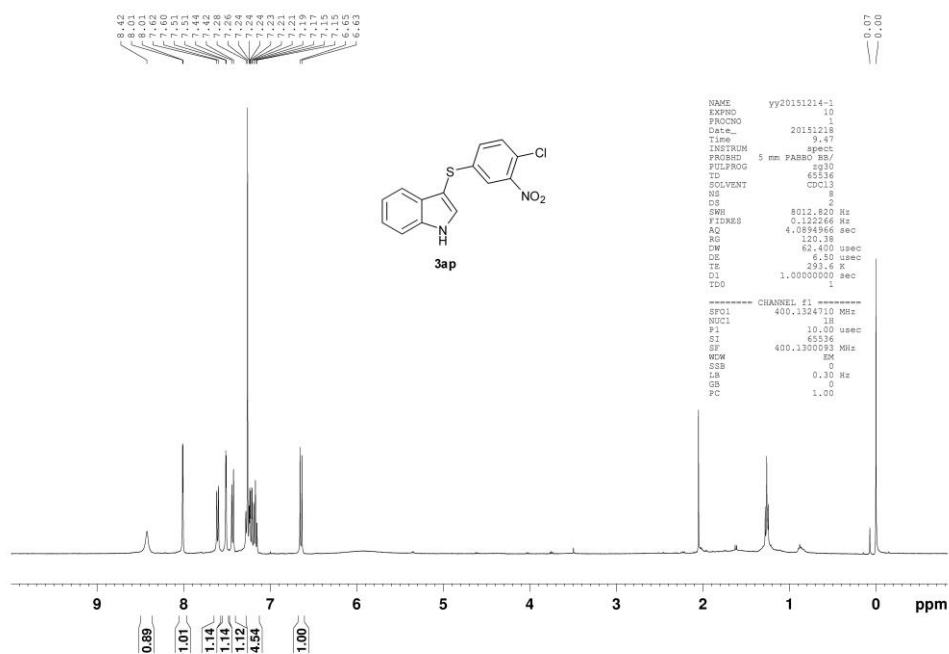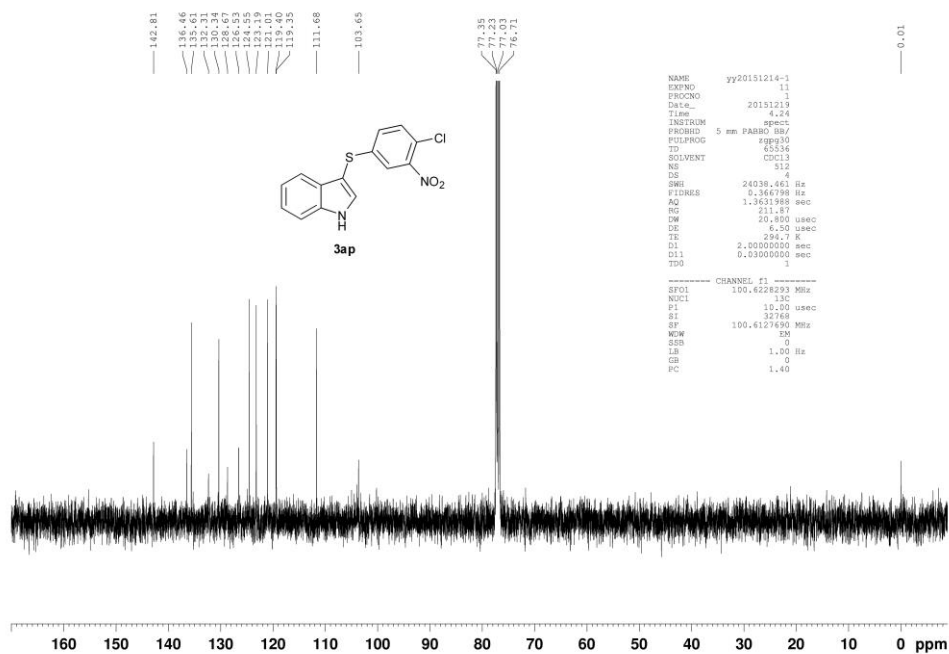

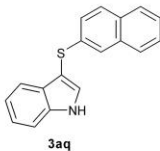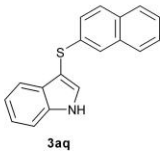

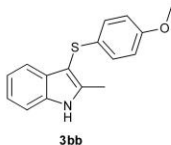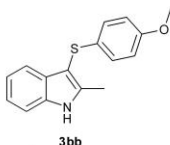

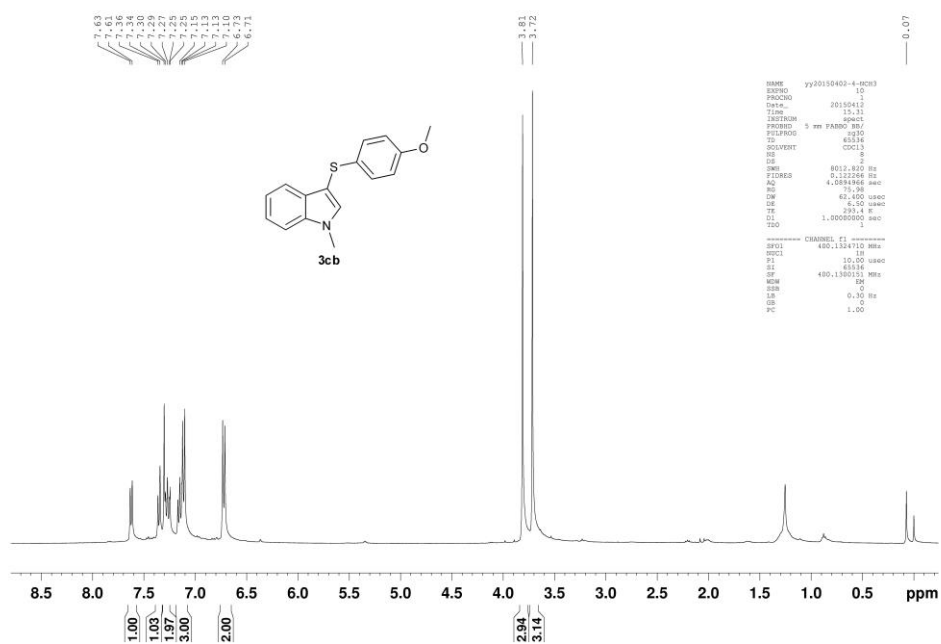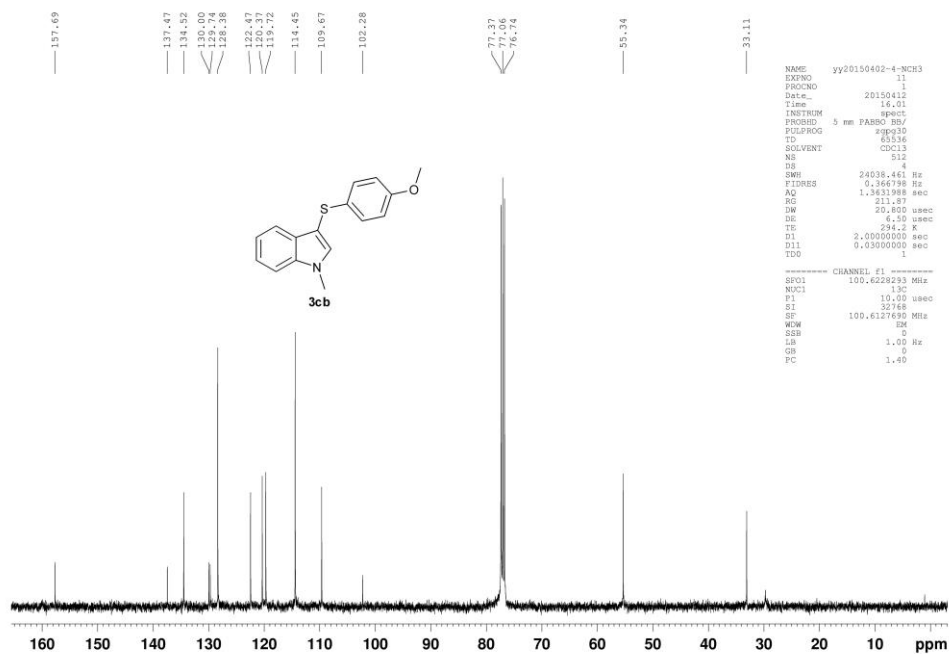

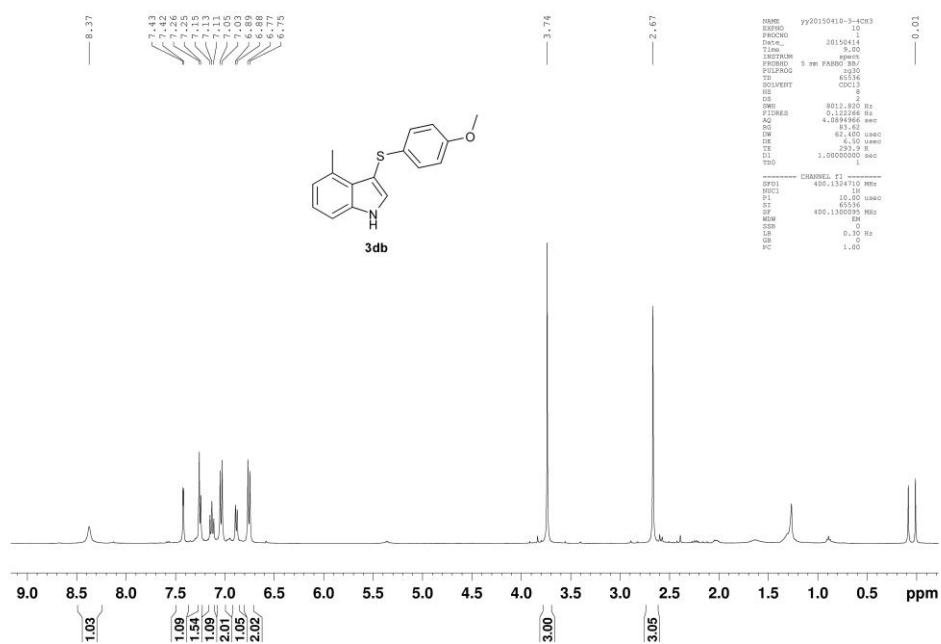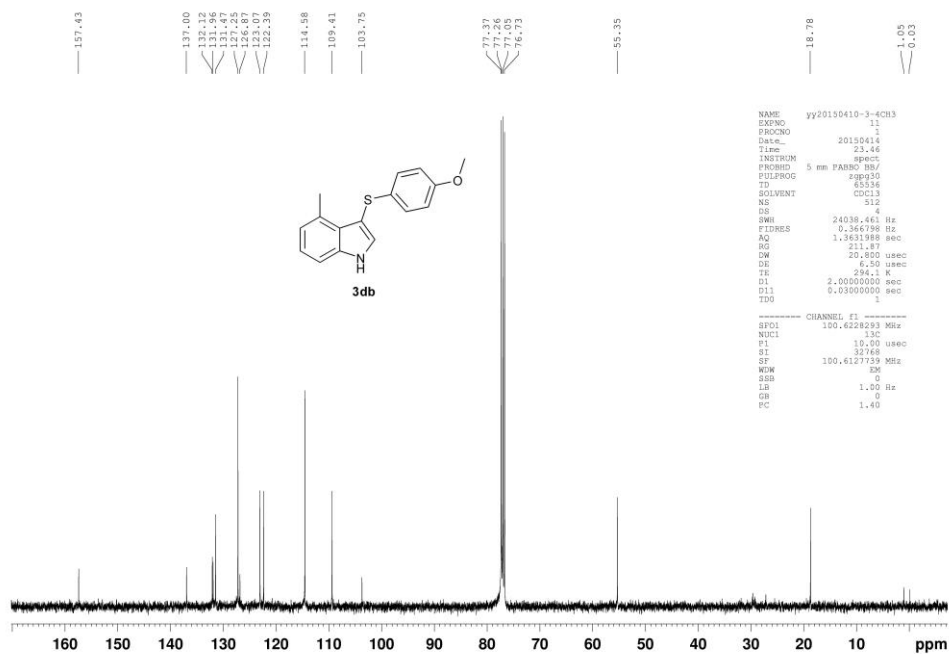

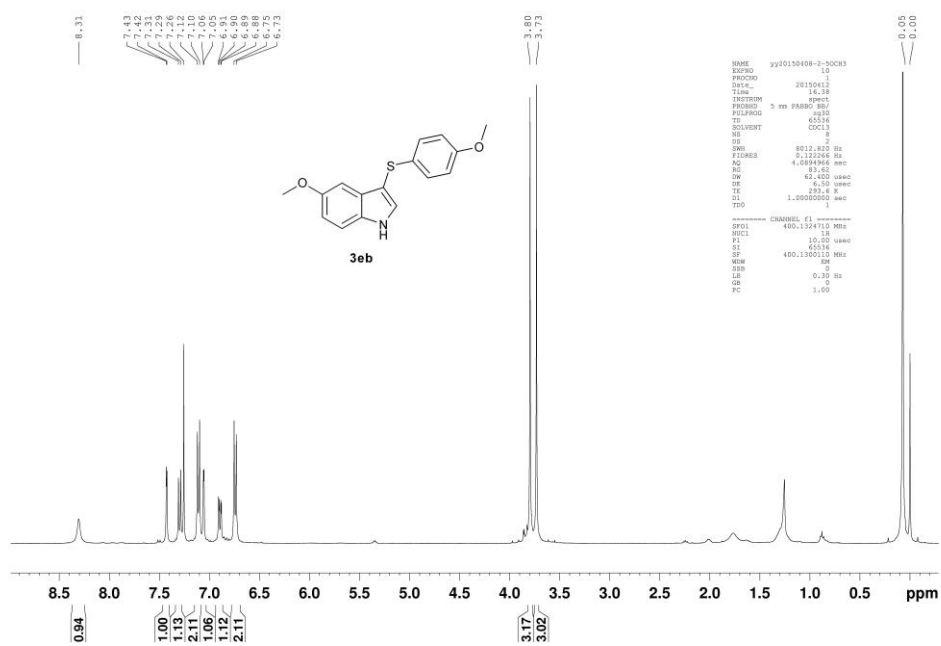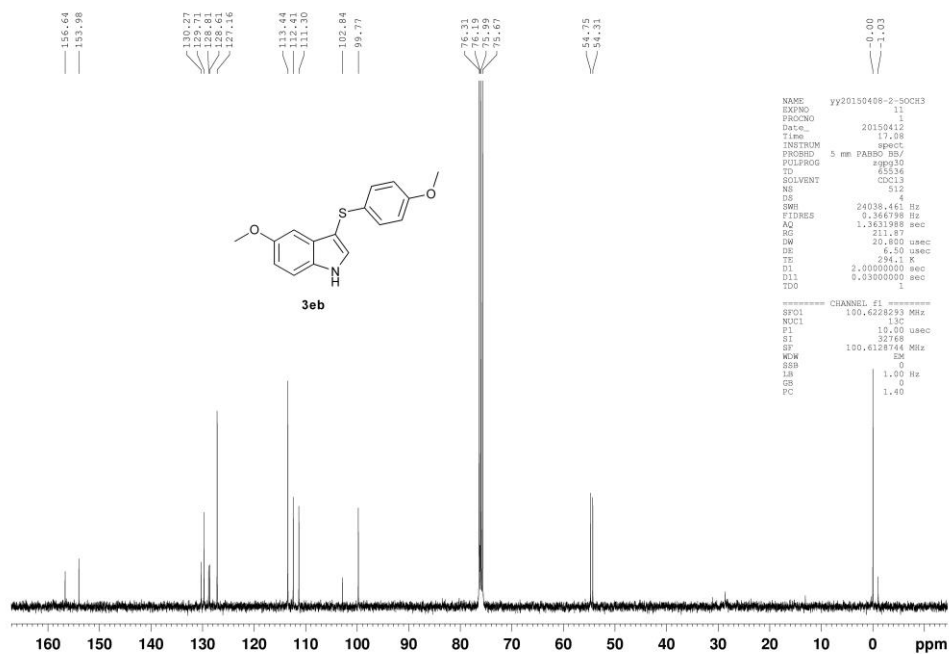

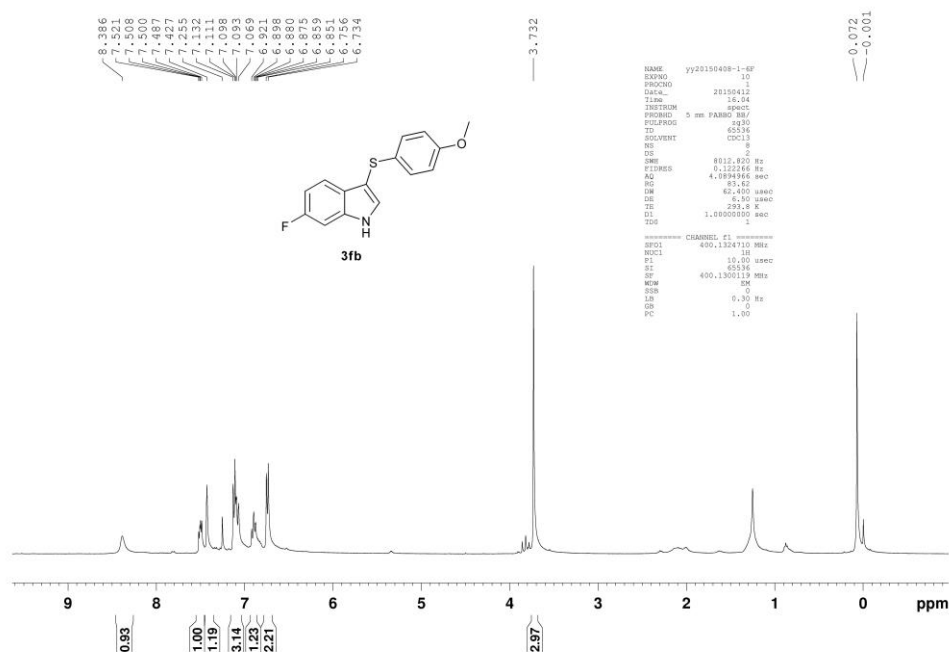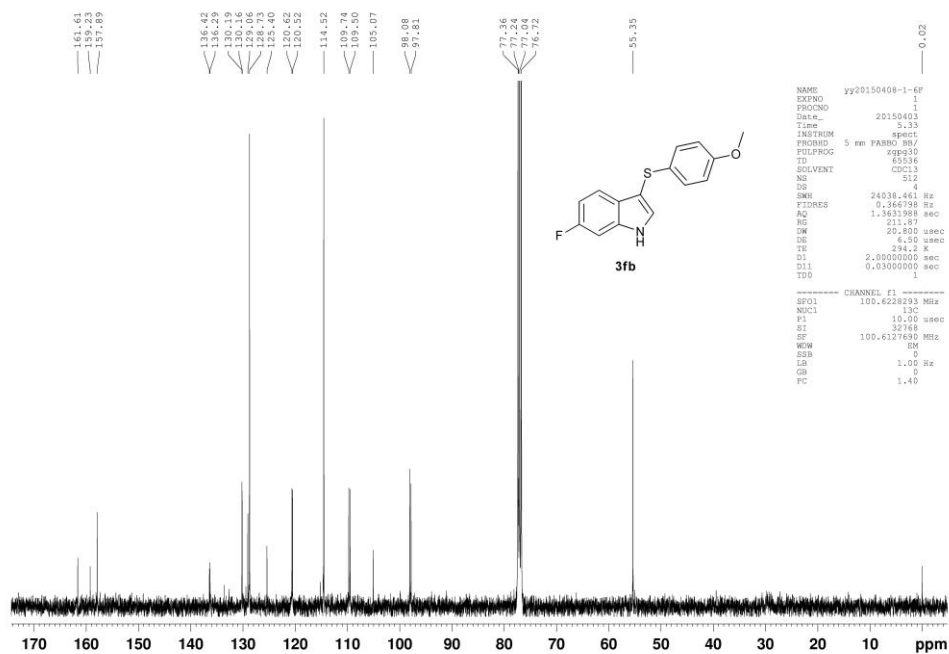



```

NAME      yy20150316-1-4Cl
EXPNO     1
PROCNO    1
Date_     20150401
Time      22.27
INSTRUM    spect
PROBHD     5 mm PABBO BB/
PULPROG    zgpg30
TD         65536
SOLVENT    CDCl3
NS         8
DS         4
SWH         8012.810 Hz
FIDRES     0.122266 Hz
AQ         4.089766 sec
RG         87.75
OW         42.100 usec
DE         6.40 usec
TE         296.2 K
D1         1.00000000 sec
D11        1
TDO        1
===== CHANNEL f1 =====
SFO1      400.032000 MHz
NUC1       1H
P1         9.18 usec
PL         0.00 dB
SF         400.030013 MHz
WOWH       0
SGB         0
LB         0.00 Hz
GB         0
PC         1.00
  
```



```

NAME      yy20150316-1-4Cl
EXPNO     2
PROCNO    2
Date_     20150401
Time      23.10
INSTRUM    spect
PROBHD     5 mm PABBO BB/
PULPROG    zgpg30
TD         65536
SOLVENT    CDCl3
NS         8
DS         4
SWH         24038.461 Hz
FIDRES     0.366798 Hz
AQ         1.363198 sec
RG         207.18
OW         50.800 usec
DE         6.50 usec
TE         297.9 K
D1         2.00000000 sec
D11        1
TDO        0.03000000 sec
===== CHANNEL f1 =====
SFO1      100.5976818 MHz
NUC1       13C
P1         9.00 usec
PL         0.00 dB
SF         100.5876240 MHz
WOWH       2K
SGB         0
LB         1.00 Hz
GB         0
PC         1.40
  
```



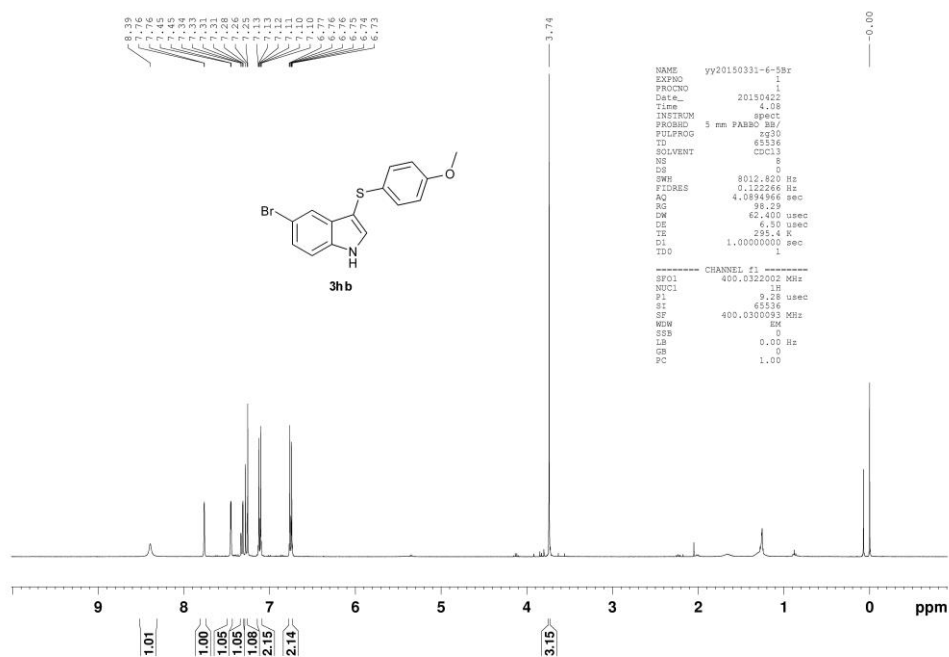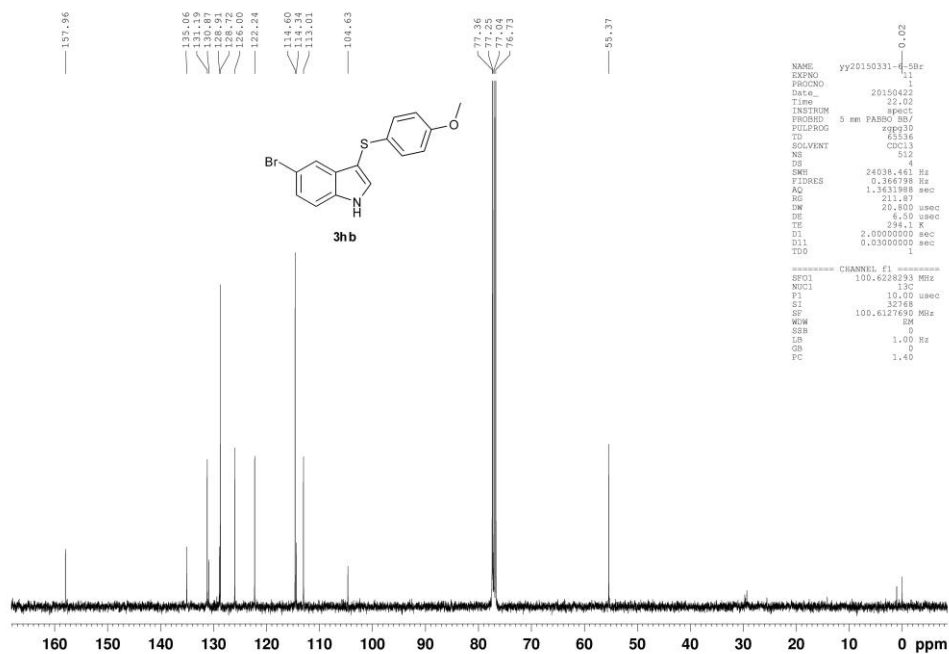

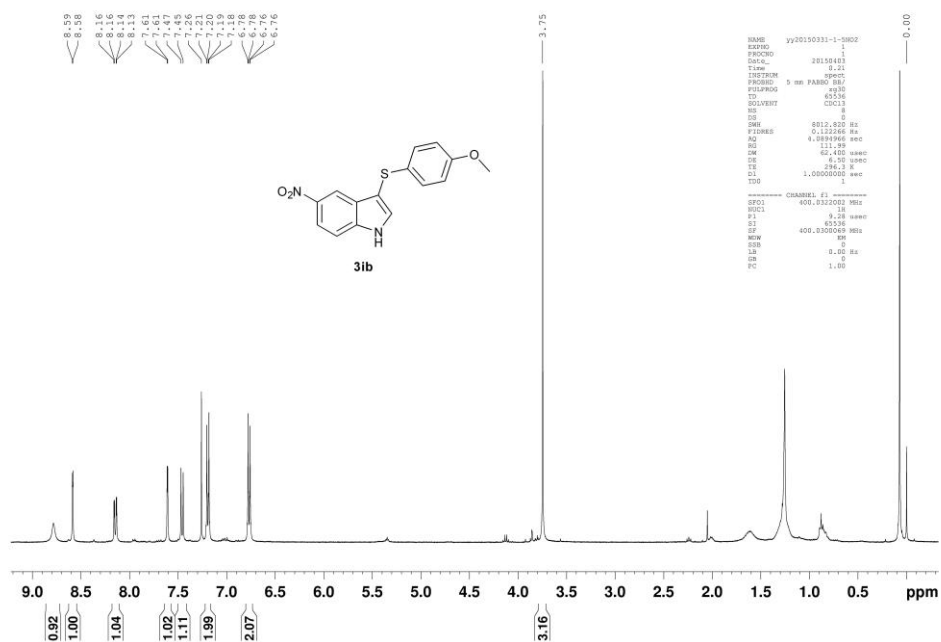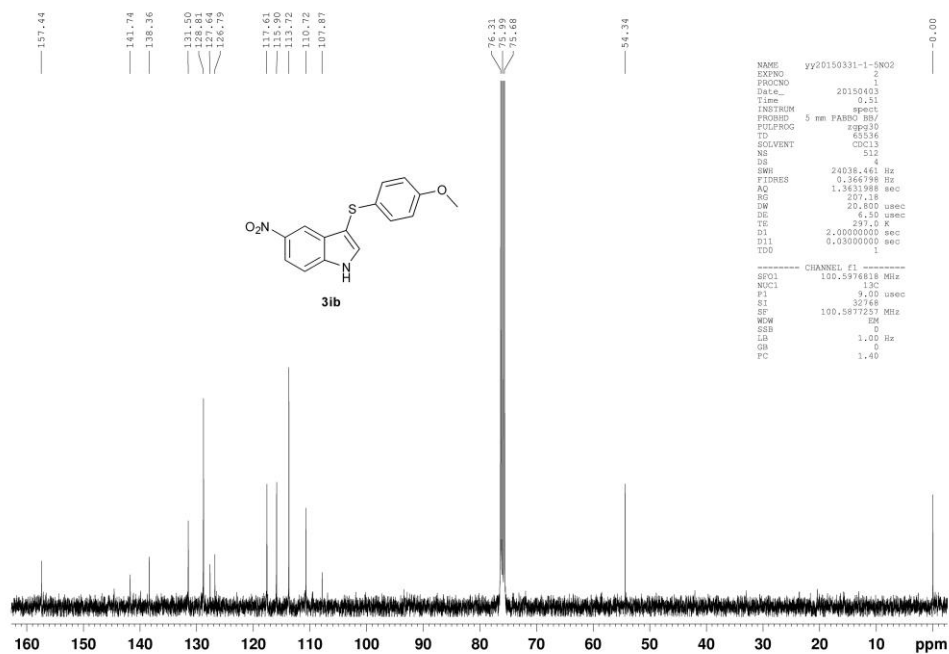

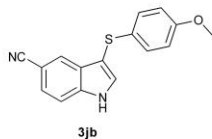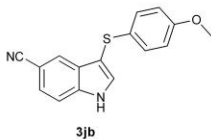

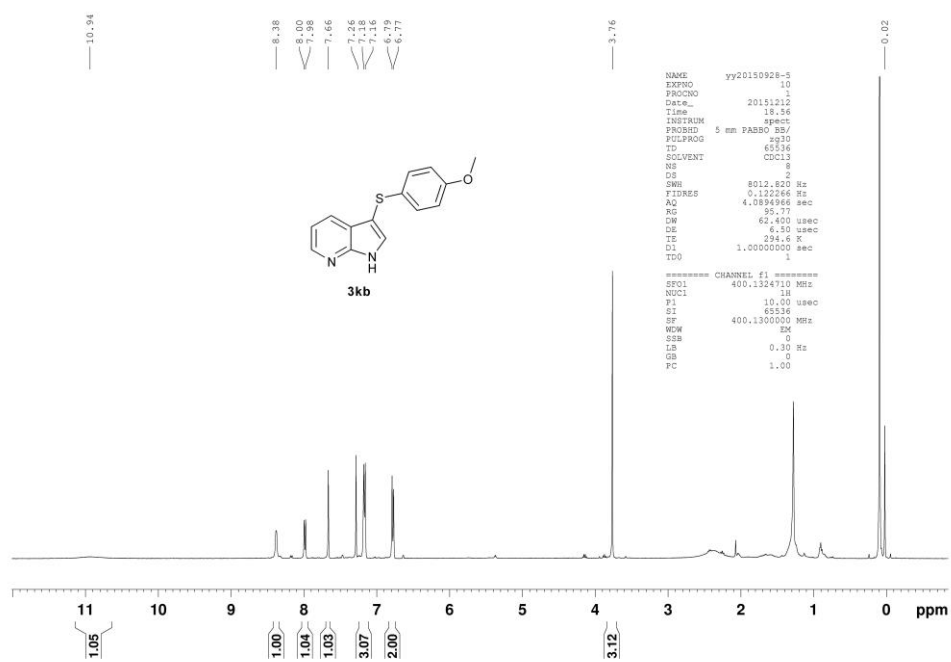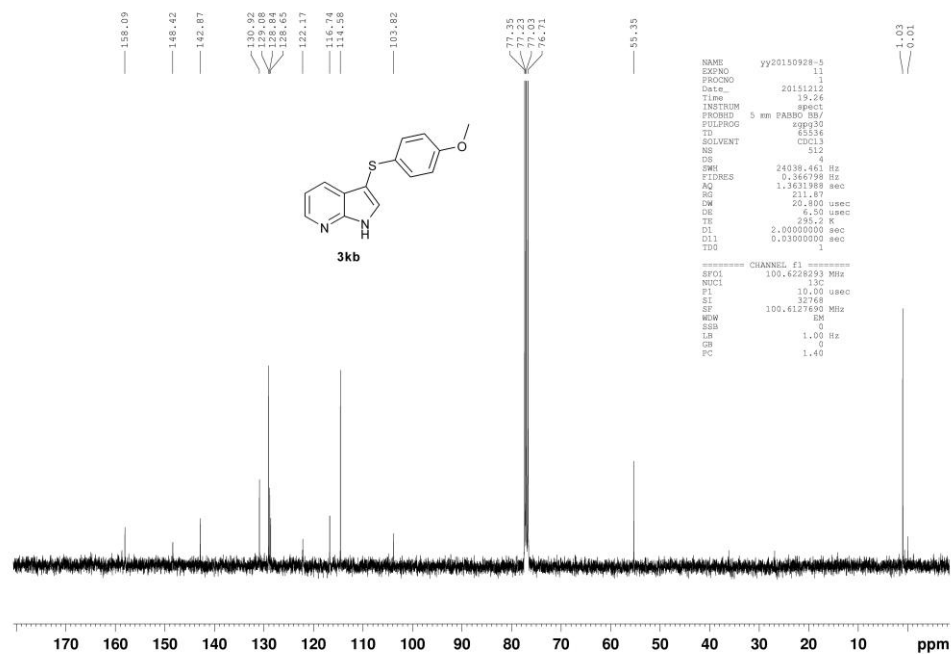

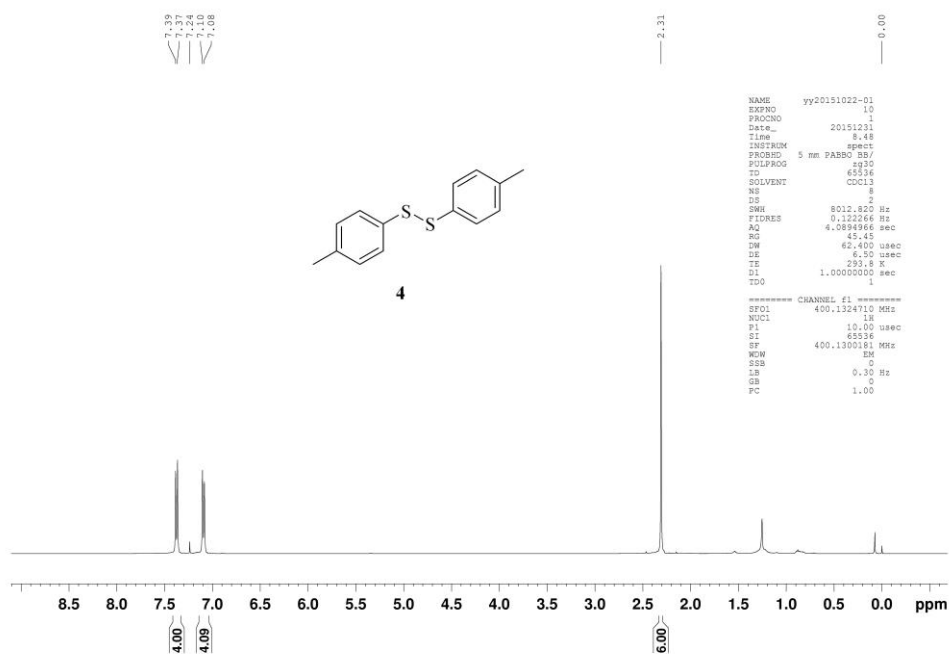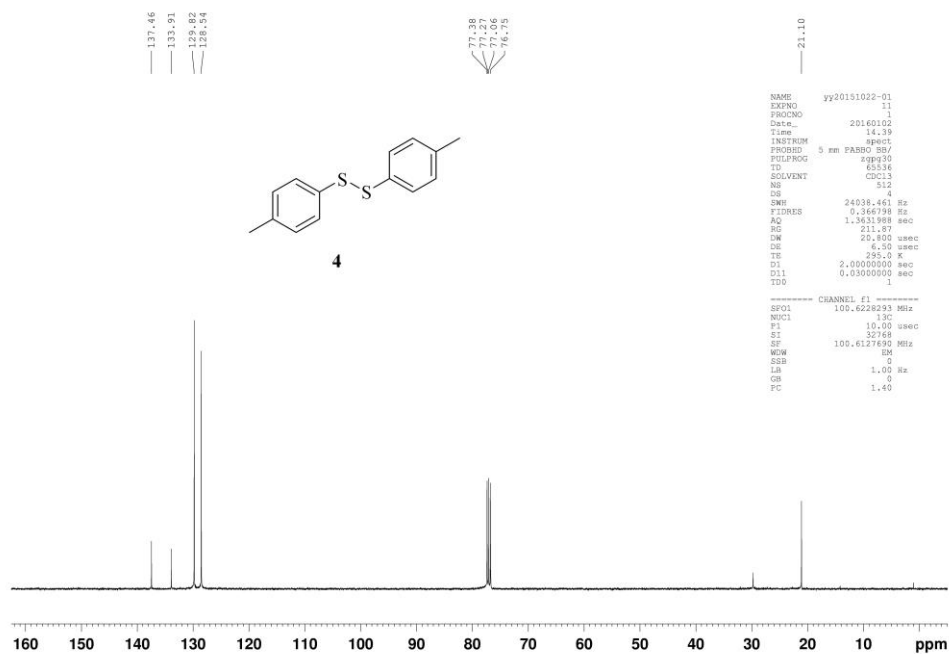

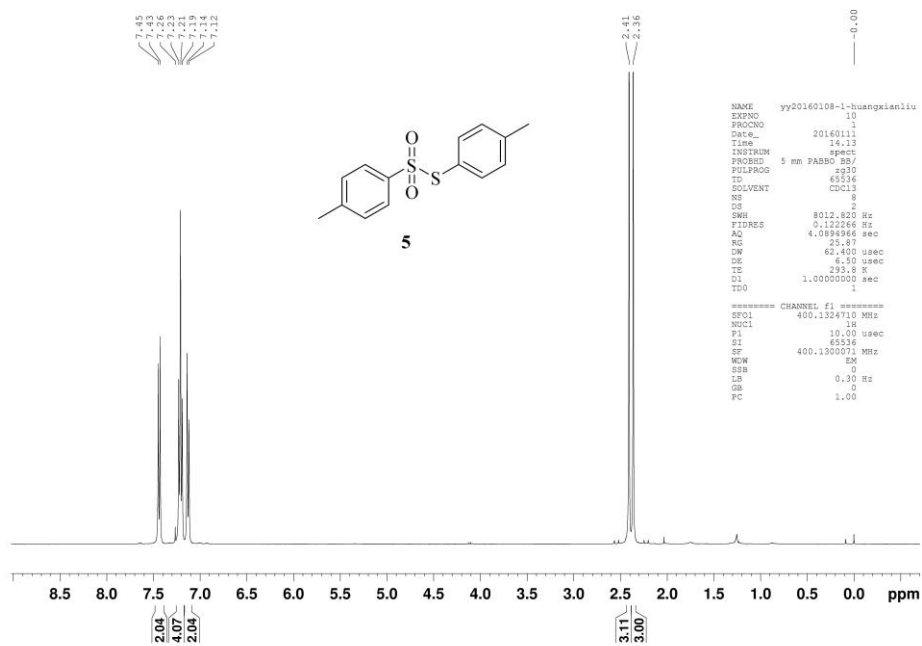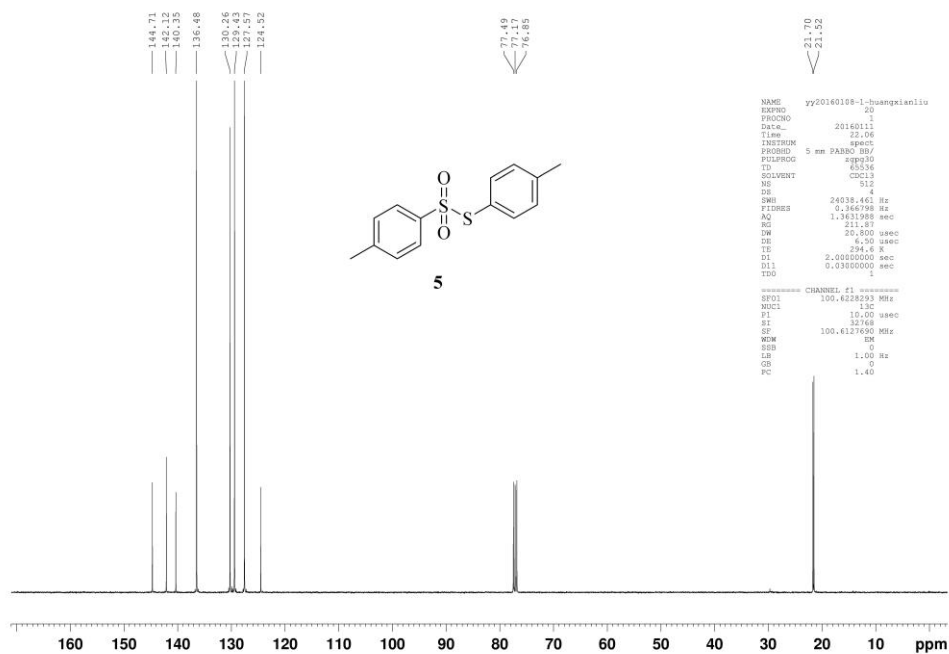

Supplement: c6gc00313c1.pdf [file c6gc00313c1.pdf]
